# Supplementary material for: When the Most Potent Combination of Antibiotics Selects for the Greatest Bacterial Load: The Smile-Frown Transition
Source: PubMed Central journal article supplement (PMC3635860; doi:10.1371/journal.pbio.1001540), 2013-04-23
Supplement: pbio.1001540.s001.pdf [file pbio.1001540.s001.pdf]

---

# WHEN THE MOST POTENT COMBINATIONS OF ANTIBIOTICS SELECTS FOR THE GREATEST BACTERIAL LOAD: THE SMILE-FROWN TRANSITION

R. PENA-MILLER, D. LAEHNEMANN, G. JANSEN, A. FUENTES-HERNANDEZ,  
P. ROSENSTIEL, H. SCHULENBURG AND R. BEARDMORE

---

## TABLE OF CONTENTS

|                                                                                            |    |
|--------------------------------------------------------------------------------------------|----|
| 1. Introduction: hit early, hit hard?                                                      | 2  |
| 1.1. Toy mathematical models: are synergistic drug combinations optimal?                   | 2  |
| 2. Drug interaction profiles: synergy and antagonism                                       | 4  |
| 3. Experimental evolution in a two-drug environment: methods                               | 6  |
| 3.1. Materials                                                                             | 6  |
| 3.2. Experimental protocol                                                                 | 6  |
| 4. Experimental evolution in a two-drug environment                                        | 8  |
| 4.1. Trade-off between rate of adaptation and degree of synergy                            | 8  |
| 4.2. A measure of antibiotic efficacy: AUC inhibition                                      | 9  |
| 4.3. Smile-frown transition in the data                                                    | 9  |
| 4.4. A corollary of the smile-frown transition: when a monotherapy is optimal              | 10 |
| 5. Analysis: whole genome sequencing                                                       | 11 |
| 5.1. Genetic adaptation in evolved populations of <i>E. coli</i> K12 (MC4100)              | 11 |
| 5.2. DNA extraction and sequencing                                                         | 11 |
| 5.3. Data analysis                                                                         | 11 |
| 5.4. Summary of results                                                                    | 12 |
| 6. Analysis: a mathematical model consistent with data                                     | 14 |
| 6.1. A core growth inhibition model: capturing dose-response curves                        | 14 |
| 6.2. Modelling synergistic drug interactions                                               | 16 |
| 6.3. A mathematical model structure to mimic the experimental protocol                     | 17 |
| 6.4. A drug efflux model                                                                   | 17 |
| 6.5. Theoretical prediction: synergy is stabilised if the efflux pump is suppressed        | 19 |
| 7. Validating the theory: testing the smile-frown experiment with an <i>acrAB</i> knockout | 20 |
| 7.1. Additional experimental details                                                       | 20 |
| 7.2. Outcome: synergy is maintained for longer with the pump knockout                      | 21 |
| 7.3. Dose-dependence: higher doses amplify the smile-frown transition                      | 23 |
| 7.4. Colony forming units (CFUs) as a density measure                                      | 25 |
| 8. Optimal drug combinations are not constant: an analysis                                 | 25 |
| 8.1. Mathematical definition of synergy                                                    | 26 |
| 8.2. Generically, the optimal combination changes through time                             | 27 |
| 9. Final comment: single cell synergy and population synergy                               | 28 |
| References                                                                                 | 29 |
| Appendix A. Parameter values                                                               | 31 |
| Appendix B. Genes annotated in the duplicated region                                       | 32 |

## 1. INTRODUCTION: HIT EARLY, HIT HARD?

Is it true that pathogen load decreases as antibiotic efficacy increases? This relationship appears self-evident. Moreover, as antibiotic efficacy can be enhanced by appropriately combining two or more drugs into a single therapy, it would also appear self-evident that the most effective way of deploying antibiotics is in combination. The combinations of antibiotic drugs preferred in clinical practise are the so-called *synergistic combinations* in which one antibiotic enhances the killing effect of another and *vice versa* [1]. Indeed, the *search for synergy* [2] is the idea that we can screen for small antibiotic molecules that enhance each other's killing effect [3] and use these as the basis of antibacterial treatments in the clinic. The century-old rationale for deploying antibiotics is simple, *hit early and hit hard* [4] and the use of synergistic combination therapies is a logical consequence of assuming the validity of this rationale.

*Hit early, hit hard* provides a rational approach to antibiotic use even when accounting for *de novo* drug-resistance evolution. If an allele confers increased drug resistance, it will sweep through a population after the antibiotic has been administered. The more drug we apply, the greater the rate of sweep and so the earlier the allele will fix in the pathogen population. The remedy, therefore, is to prevent resistance from arising in the first place and to apply as much drug as possible, as early as possible to keep pathogen load to a minimum for this minimises the probability of the novel allele arising in the first place.

**1.1. Toy mathematical models: are synergistic drug combinations optimal?** Let us test the robustness of this argument using a very simple mathematical model. Imagine a single bacterial strain growing in a competitive environment where the resources needed for growth are scarce. Suppose  $S(t)$  denotes the density of a bacterial population per unit volume at time  $t$  and, in the absence of drug, the population dynamics of the bacterium follow the following logistic equation:

$$(1) \quad \frac{d}{dt}S = S(1 - S), \quad 0 < S(0) \ll 1.$$

The dynamics of equation (1) see the population grow to carrying capacity at some rate, here both these parameters have been set to be unity. We now wish to clear the bacterium from its environment and so we introduce an antibiotic, with killing efficacy  $a$ :

$$(2) \quad \frac{d}{dt}S = S(1 - S) - aS, \quad 0 < S(0) \ll 1.$$

Suppose we now ask for the response time,  $t_{50}$ , at which the bacterium achieves half its final carrying capacity, so that  $S(t_{50}) = 1/2$ . Due to the nature of the model, it is a trivial fact that the best therapy, the one that maximises  $t_{50}$  is the one with the largest possible value of  $a$ . Thus equation (24) is consistent with the hit early, hit hard rationale.

Now suppose we modify equation (24) by including a second drug. We suppose it has the same killing efficacy as the first, but when we combine the two their total killing efficacy is increased. So, we now adapt the term 'a' to be a function of a variable  $\theta$  between 0 and 1 such that  $a(0) = a(1) > 0$ . The idea here is that  $\theta$  controls the fraction of each drug used in a combination treatment, so  $\theta = 0$  represents the use of one drug only and  $\theta = 1$  represents the use of the other drug. The quadratic function of  $\theta$ ,

$$a(\theta) = 1 + \theta(1 - \theta),$$

suffices to mimic two synergistic drugs of equal killing effect in the following model:

$$(3) \quad \frac{d}{dt}S = S(1 - S) - a(\theta)S, \quad 0 < S(0) \ll 1.$$

Again, it is trivial that  $t_{50}$  is minimised by solutions of (3) for the '50-50' combination therapy, namely the treatment that mixes both drugs in equal amounts, so that  $\theta = 1/2$ . Thus, the structure of the model (3) is again consistent with hit early, hit hard rationale.

Now suppose we invoke a further change to our model and explicitly include drug resistance adaptation. To this end, without specifying an explicit physical mechanism supporting drug resistance at this point, we suppose that a second phenotype,  $R(t)$ , can be found in the population that is identical to the drug-susceptible wild-type,  $S$ , but which is completely drug resistant:

$$(4a) \quad \frac{d}{dt}S = S(1 - (S + R)) - a(\theta)S - \mu S, \quad 0 < S(0) \ll 1,$$

$$(4b) \quad \frac{d}{dt}R = S(1 - (S + R)) + \mu S, \quad R(0) = 0.$$

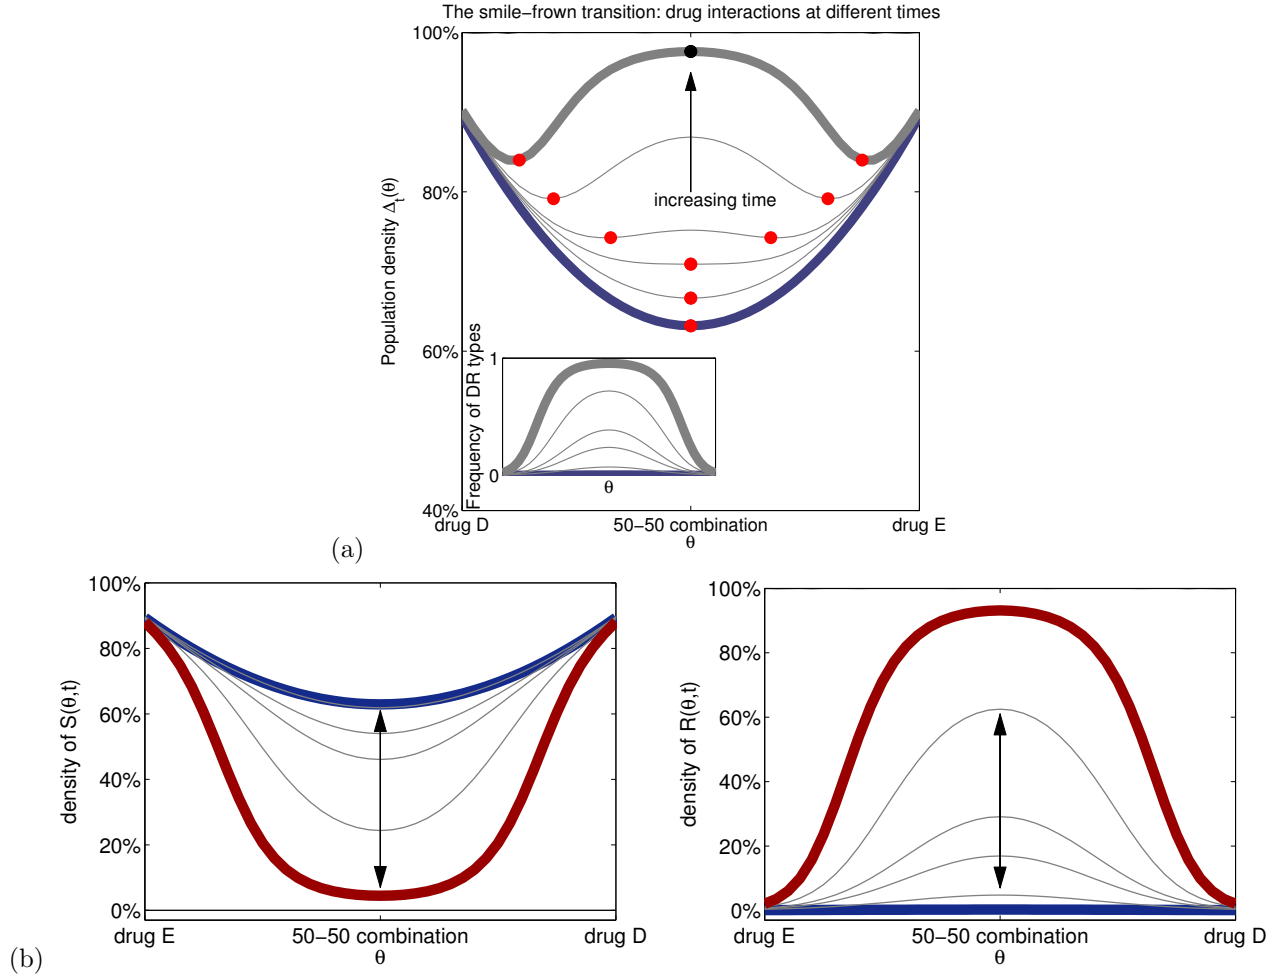

**supplement fig. S1 – (Competitive Release and the Smile-Frown Transition)** (a) Population density (as a fraction of carrying capacity) on the  $y$  axis is plotted against the drug combination parameter,  $\theta$ , on the  $x$  axis for treatments of different duration. Two drugs are used, ‘D’ and ‘E’, whose synergy is apparent over treatments of short duration because the population density is minimised where  $\theta = 1/2$  (the red dot situated on the thick blue line). However, there comes a future time for which density is maximised for this treatment (the black dot on the thick grey line). The red dots show the path of the treatments of minimal density as time progresses: they start as combination therapies but eventually become monotherapies. The inset shows the frequency of drug-resistance in the population at the same times (denoted ‘Frequency of DR types’ on the  $y$  axis), illustrating that drug resistance sweeps fastest where synergy is greatest. In both diagrams,  $\theta$  ranges from zero (drug D) to one (drug E). (b) The densities of  $S$  and  $R$  are shown at different times, the thick blue line denoting a treatment of short duration and a thick red line denoting a longer treatment. The black arrow denotes the loss of  $S$  that occurs because of the drug as the treatment proceeds and it has the same length in both left and right figures. However, the right-hand figure shows that the gain in density of  $R$  for that length of treatment more than compensates for the loss of  $S$  due to the drug.

Here  $\mu > 0$  is the constant rate at which the drug-susceptible phenotype gains resistance and, to begin with, we assume that there are no resistant bacteria in the population. We can use different optimality criteria to understand how to deploy drugs in equation (4), the most natural one is to minimise population density, so we denote the population density by

$$(5) \quad \Delta_t(\theta) = S(t) + R(t),$$

noting that the latter depends on  $\theta$  implicitly.

The question we now ask is for what value of  $\theta$  is  $\Delta_t(\theta)$  minimised? We know by design that  $\theta = 1/2$  is the value corresponding to the most synergistic treatment and that this value also minimises population density for a short period of time. But what happens as time increases? Supplement fig. S1 answers this question.

It shows that there comes a future point at which the most synergistic treatment ceases to be optimal and, in fact, a short time later this drug combination becomes the worst treatment of all. Somewhere between these two times, the monotherapies reduce population density below what can be achieved by combining the drugs.

The inclusion of multi-drug resistance thus complicates the picture. For example, it is not true for (4) that the optimal therapy hits the drug-susceptible bacteria as hard as possible. Rather, the optimal therapy takes two forms: a near 50-50 combination consisting of both drugs at equal concentration for short treatments, but a monotherapy of either drug is better for longer treatments.

## 2. DRUG INTERACTION PROFILES: SYNERGY AND ANTAGONISM

In order to test these theoretical predictions, the following section will describe a laboratory-based microcosm in which different strains of *E. coli* K12 are challenged by the antibiotics erythromycin and doxycycline. However, before we can understand the outcome of those experiments, we need to define some common terminology and present basic data analysis tools we need to understand how different combinations of antibiotics interact.

In the remainder, we will assume that a population of bacteria is cultured in the presence of two antibiotics at extracellular concentrations denoted by two variables,  $D$  and  $E$ ; the latter are called *basal drug concentrations*. Bacterial population density, for instance measured in units of optical density (OD or OD<sub>600nm</sub>) in a shaken culturing device will depend on the concentrations of both these drugs. If  $t$  denotes time, density will be denoted by the drug-dependent time-series  $B(t; D, E)$  and as cells are cultured for a fixed amount of time,  $T$  hours say, it follows that  $0 \leq t \leq T$ . In what follows, our fitness measure of a bacterial population will be the optical density determined empirically from a lab-based experimental microcosm, but other measures of fitness could, equally, be used.

A fair comparison of the efficacy of a drug combination necessitates that each basal drug concentration,  $D$  and  $E$ , is normalised to achieve equal inhibitory effect over some period of time. We will therefore assume that each single-drug monotherapy achieves a factor- $r$  reduction in bacterial density relative to a drug-free environment by the end of the experiment, thus

$$B(T; D, 0) = B(T; 0, E) = rB(T; 0, 0).$$

As in practise we will normalise the basal drug concentrations to achieve 50% inhibition with respect to the null antibiotic control in a growth assay lasting twenty-four hours, in the remainder we have in mind the specific value  $r = 1/2$ . For convenience, we therefore denote by  $D_{50}$  the basal concentration of the first drug and assume that

$$B(T; D_{50}, 0) = \frac{1}{2}B(T; 0, 0).$$

Similarly,  $E_{50}$  is the concentration of the second drug,  $E$ , and it satisfies  $B(T; 0, E_{50}) = B(T; 0, 0)/2$  too.

Using  $D_{50}$  and  $E_{50}$  as basal drug concentrations, we introduce a drug combination parameter that allows us to combine both drugs whilst maintaining a constant effective dosage. This parameter, denoted throughout by  $\theta$ , takes values between zero and one inclusive and it can be used to represent any drug combination along the *equidosage line* (see supplement fig. S2). For each value of  $\theta$ , the actual concentration of drug deployed to the environment of the bacteria is then  $\theta \cdot D_{50} \mu\text{g/ml}$  of drug  $D$  and  $(1 - \theta) \cdot E_{50} \mu\text{g/ml}$  of drug  $E$ .

The basal concentrations will be fixed throughout, the only freedom permitted in terms of determining optimal drug therapies will be through the parameter  $\theta$ . Indeed, the value of  $\theta$  that gives rise to the lowest bacterial density will be deemed the optimal combination. Our definitions are designed to ensure a fair comparison between different treatments, we are therefore not at liberty to deploy antibiotics at arbitrarily high dosages and deem those better therapies.

The degree of interaction between drugs is usually defined in terms of the deviation from a neutral interaction, derived either using Bliss independence or Loewe additivity (for an extensive discussion of this topic see [2]). Here we will use the latter and define synergism based on the so-called interaction profile

$$i(\theta) = B(T; \theta D, (1 - \theta)E),$$

defined for  $0 \leq \theta \leq 1$ .

**Definition 1** (the Loewe drug interaction profile:  $i(\theta)$ ; synergy, antagonism and additivity). *A drug interaction is said to be synergistic if, for all  $\theta$  between zero and one exclusive, the effect of the drugs combined is greater than the sum of effects produced by each drug separately:*

$$(6) \quad i(\theta) < \theta \cdot i(1) + (1 - \theta) \cdot i(0).$$

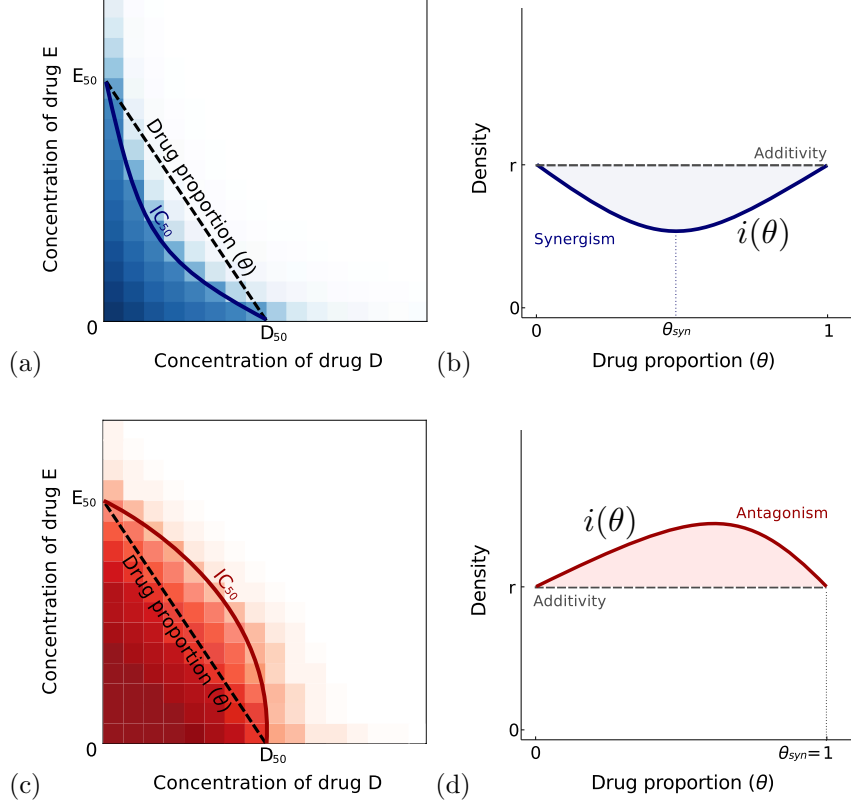

**supplement fig. S2** – The drug interaction profile is related to a ‘checkerboard’ diagrams shown in (a) and (c). In the latter, the concentration of both drugs is given on the  $x$  and  $y$  axes, bacterial growth inhibition (or population density or some other fitness measure) is then plotted on the  $z$  axis. The contour of all concentrations that reduce this measure by half is an *isobole* here denoted  $IC_{50}$  and figures (a) and (c) show two checkerboard plots viewed from above. Basal concentrations of both drugs that achieve the same inhibitory effect in this illustration are  $D_{50}$  and  $E_{50}$ ,  $\theta$  then parameterises the equidose line between these two values. The fitness measure evaluated along this line is shown in (b) and (d) and we define the degree of interaction based on this curve, this is  $i(\theta)$ . We say the interaction is *synergistic* when the drug proportion that minimises  $i(\theta)$  satisfies  $0 < \theta < 1$  as in (b), we denote the resulting value by  $\theta_{syn}$ . In (d) we observe  $\theta_{syn} = 0$  or  $\theta_{syn} = 1$ , in this case the drugs are said to be *antagonistic* as  $i(\theta)$  is maximised by a drug combination.

It follows by construction that  $i(1) = i(0) = rB(T; 0, 0)$  and so (6) asks that treatment efficacy is greatest when drugs are combined. Note that inequality (6) is necessarily satisfied if  $i(\theta)$  is a convex function of  $\theta$ .

The most synergistic drug combination is denoted by the value  $\theta_{syn}$ , this is the drug proportion that satisfies

$$(7) \quad i(\theta_{syn}) = \min_{0 \leq \theta \leq 1} i(\theta);$$

it must follow that  $0 < \theta_{syn} < 1$  for a synergistic interaction. The drug interaction is said to be antagonistic if the reverse inequality applies in (6) and in this case  $\theta_{syn} = 0$  or  $\theta_{syn} = 1$ ; this will apply if  $i(\theta)$  is a concave function of  $\theta$ . Under these assumptions the drug interaction is said to be additive if  $i(\theta)$  is a constant and therefore independent of  $\theta$ .

Definition 1 is quite standard but the following discussion is not commonly undertaken when antibiotic interactions are discussed: bacterial inhibition due to drugs is measured over a time interval of total length  $T$  hours. We therefore introduce time,  $T$ , explicitly into the interaction profile and write the latter as a time-dependent interaction  $i(\theta, T)$ . The time-dependent optimal combination,  $\theta_{opt}(T)$ , is then the drug proportion that satisfies

$$(8) \quad i(\theta_{opt}(T), T) = \min_{0 \leq \theta \leq 1} i(\theta, T)$$

and it follows by definition that  $\theta_{opt}(T)$  and  $\theta_{syn}$  are equal for small values of  $T$ .

From the dimensionless interaction profile

$$i_d(\theta, T) = -r + \frac{B(T; \theta D, (1 - \theta)E)}{B(T; 0, 0)},$$

we define the following *degree of interaction* at  $T$  hours,  $I(T)$ , a value given by the mean of drug interactions over all possible drug combinations:

$$(9) \quad I(T) = \int_0^1 i_d(\theta, T) d\theta.$$

There are different definitions of drug synergism in the literature and Definition 1 is given using Loewe additivity as its starting point. In order to provide consistency of results across different possible definitions of drug interaction, we will also use the following synergy measure defined in terms of Bliss independence [2].

**Definition 2** (the Bliss interaction profile:  $i_b(\theta, T)$ ). *The time-dependent Bliss interaction profile is given by*

$$(10) \quad i_b(\theta; T) = \frac{B(T; \theta D, 0)}{B(24; 0, 0)} \cdot \frac{B(T; 0, (1 - \theta)E)}{B(T; 0, 0)} - \frac{B(T; \theta D, (1 - \theta)E)}{B(T; 0, 0)},$$

*positive values of  $i_b(\theta; T)$  correspond to a synergistic interaction while negative values correspond to antagonism.*

### 3. EXPERIMENTAL EVOLUTION IN A TWO-DRUG ENVIRONMENT: METHODS

Now the basic numerical tools needed to define and analyse drug interactions have been detailed, we continue with a description of an evolutionary experiment in which a bacterium is challenged by drugs that interact synergistically. The experimental methods are based on those of a previous study [5], detailed as follows.

The following serial dilution protocol was implemented. A shaken microtiter plate with liquid minimal growth medium is inoculated with a small density of bacteria. In addition to the limiting carbon source and other nutrients needed for growth, each well in the plate contains a combination of antibiotics with basal concentrations  $D$  and  $E$  at a proportion determined by the parameter  $\theta$ . Cells are cultured for  $T = 24$  hours after which a small and fixed volume is taken from each well and transferred to a second plate which contains fresh liquid growth medium and the same combination of antibiotics. The repetition of this process defines a serial transfer experiment. It is essential to note that the supplied concentrations of extracellular resources and drugs and each drug proportion, defined as  $\theta$  above, are *identical* in every transfer. This allows us to study the adaptation of a bacterial population in a fixed drug environment.

**3.1. Materials.** *E. coli* K12 (MC4100) (from the Coli Genetic Stock Center: <http://cgsc2.biology.yale.edu/Strain.php?ID=9973>) was used and inoculation cultures were started from the same single colony for all the experiments described below.

Experimental populations were cultured in M9 medium with the following concentrations: Part A: 350 g/LK<sub>2</sub>HPO<sub>4</sub>, 100 g/LKH<sub>2</sub>HPO<sub>4</sub>; Part B: 29.4 g/L Trisodium citrate, 50 g/L(NH<sub>4</sub>)<sub>2</sub>SO<sub>4</sub>, 5 g/LMgSO<sub>4</sub>. Parts A and B were 50x stock solutions in deionized water, sterilised by autoclaving. For M9 minimal medium they were diluted in water accordingly with 0.2% glucose and 0.1% casamino acid added as nutrients.

The antibiotics used are erythromycin (Sigma-Aldrich, Product #856193) and doxycycline (Sigma-Aldrich, product #D9891). Liquid stocks were prepared from powder stocks at 50mg/ml in ethanol for erythromycin and at 5mg/ml in deionized water for doxycycline (afterwards filter sterilised) and frozen at -20°C. All dilutions were prepared in M9 growth medium and then stored in the fridge at approx. 4-8°C.

**3.2. Experimental protocol.** Experiments were conducted in 384-well plates with 100μl liquid volume. Growth medium and antibiotics were distributed over the plates fully randomised by a pipetting robot (Tecan Freedom Evo) to exclude gradient effects (for typical randomisation patterns, see supplement fig. S3). Plates were inoculated and transferred with a 384-well replicator. Experiments were conducted at 30°C, density measurements were taken in a shaken plate reader (Tecan Genios).

The full protocol consisted of three sets of experiments:

(Ex. 1) **Single-drug dose-response experiments to calibrate equal inhibitory effects.**

Preliminary experiments were performed to determine dose-response relationships for erythromycin and doxycycline, both are shown in supplement fig. S11. This data determines the MIC and the IC<sub>50</sub> for both drugs.

(Ex. 2) **Five day serial dilution experiment with different multidrug combination treatments.**

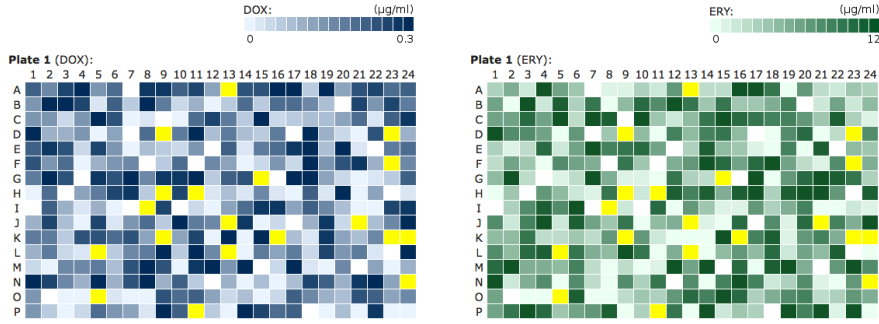

**supplement fig. S3** – In order to exclude gradient effects, treatments across the 384-well plates were randomised using a pipetting robot (Tecan Freedom Evo). This figure illustrates typical randomisation patterns for different concentrations of (left) doxycycline and (right) erythromycin for 16 drug proportions in the equidosage line. White squares correspond to empty-well controls and yellow squares to null-antibiotic controls.

Basal concentrations of both drugs were chosen from the preliminary experiment to achieve 50% inhibition at 24h ( $E_{50} = 9\mu\text{g/ml}$  for erythromycin and  $D_{50} = 0.15\mu\text{g/ml}$  for doxycycline). This experiment then consisted of serial dilutions for each of the following sixteen drug combinations:

$$\left( \frac{0}{15}D_{50} + \frac{15}{15}E_{50}, \frac{1}{15}D_{50} + \frac{14}{15}E_{50}, \dots, \frac{15}{15}D_{50} + \frac{0}{15}E_{50} \right).$$

Supplement fig. S4 illustrates the optical densities of a population of *E.coli* cultured at each of these drug combinations. In addition to these treatments, the following three controls were included: (1) M9 growth medium without antibiotics and without inoculation to serve as a reference for the density measurements, (2) M9 growth medium without antibiotics but with inoculation to serve as the uninhibited growth reference and (3) M9 growth medium with  $E_{50}$  and  $D_{50}$  to provide a lower-bound control on bacterial growth. All treatments and controls were replicated nineteen times and pipetted into one plate.

Each one of the five prepared microtiter plates was stored at 4°C until the day of their respective usage. So, in order to control for degradation of the drugs, a sixth ‘checking’ plate was prepared at the same time and stored with the other five plates throughout the duration of the five day experiment. At the end of the experiment this plate was inoculated with an overnight culture of the original colony and measured for 24h. Both on day one and when using the checking plate, doxycycline and erythromycin caused a significant reduction of the AUC (all 4 tests: Wilcoxon signed rank test,  $W = 361, N = 19, p < 0.0001$ ). This is consistent with maintenance of the efficacy of the drugs for the entire five-day protocol.

An additional test was performed to determine whether resistance was the product of epigenetic adaptation alone. Ten samples each of the initially most synergistic drug treatment and the control treatment without drug were obtained from the end of the evolutionary experiment and cultured in M9 growth medium without antibiotics for 24h. Afterwards, the resulting populations were all subjected to the initially most synergistic drug combination for another 24h. Consistent with a likely genetic basis to drug-resistance adaptation, samples from the short-term synergistic treatment still displayed a higher AUC when compared to the no antibiotic control treatment (Wilcoxon signed rank test,  $W = 92, N = 10, p < 0.001$ ).

### (Ex. 3) Checkerboards and Isobolograms: standard drug-resistance assays.

Checkerboards were obtained by measuring the optical density at 24h of a grid composed of sixteen concentrations of each drug. Each one of the 256 drug combinations of our grid was replicated 11 times and pipetted onto 8 plates. Six wells with M9 growth medium but without inoculation were also included in a random distribution on each plate to serve as a contamination control and as density reference. Plates were kept in an incubator on shakers and density measurements taken every 45min for 24h.

The purpose of this experiment was to obtain two isobolograms: the first one was inoculated with the original isogenic population of susceptible bacteria while the second was inoculated with a sample from the highly synergistic combination ( $4.8\mu\text{g/ml}$  erythromycin and  $0.08\mu\text{g/ml}$  doxycycline) obtained at the beginning of the fifth day of Ex. 2.

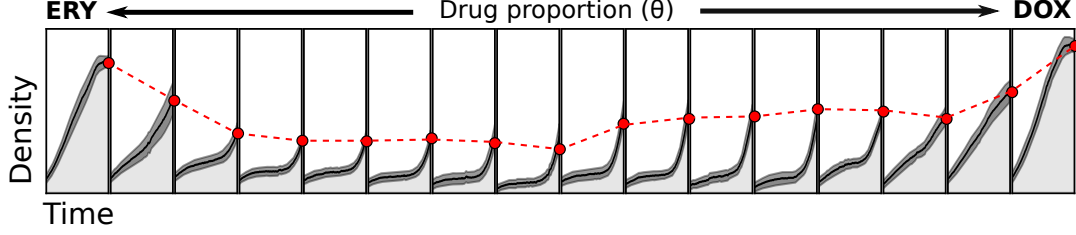

**supplement fig. S4 – (The U-shaped smile in data.)** Optical densities as a function of time for one 24-hour season under different drug treatments characterised by the parameter  $0 \leq \theta \leq 1$ . The box in the far left illustrates the optical density of bacteria growing in erythromycin monotherapy ( $E = 9 \mu\text{g/ml}$ ), the box at the right corresponds to doxycycline monotherapy ( $D = 0.15 \mu\text{g/ml}$ ), while every other box represents a multidrug combination treatment given by the pair  $(\theta D, (1 - \theta)E)$ . The red dots indicated at the same time on each day show that bacterial density at that time is minimised when  $\theta \approx 0.5$ . As a result, we say that erythromycin and doxycycline have a synergistic interaction; note how this red curve has the characteristically near-convex ‘U-shape’ associated with synergy.

#### 4. EXPERIMENTAL EVOLUTION IN A TWO-DRUG ENVIRONMENT

**Remark 1.** *In the following, the terms ‘day’ and ‘season’ will be used synonymously for ‘transfer’ in our batch-transfer protocol (Ex. 2 described above).*

**4.1. Trade-off between rate of adaptation and degree of synergy.** Now the serial dilution protocol ‘Ex. 2’ has been detailed, we can define a non-genetic measure of adaptation to treatment that uses the data it produces. Let  $N$  denote the number of transfers (ie. days) in a serial dilution experiment with each transfer denoted by the index  $j \in \{1, N + 1\}$ . The density of bacteria at time  $t$  in a given well at transfer  $j$  is denoted by  $B_j(t; D, E)$ . If  $0 < \eta \ll 1$  is a dilution parameter denoting the volume fraction of the dilution taken at the end of each day, then the act of performing this daily transfer can be described mathematically by the expression:

$$(11) \quad B_j(0; D, E) = \eta \cdot B_{j-1}(24; D, E).$$

A concept we make use of, closely related in spirit to one proposed in [5], is the *rate of adaptation* that we can now define. This quantity, illustrated in supplement fig. S5, measures how quickly resistance phenotypes spread within a population in a serial transfer experiment. Formally, the measure is defined as follows.

**Definition 3 (Rate of adaptation).** *Denote by  $Y_j(\theta)$  the total increase in bacterial density observed during transfer  $j$ :*

$$(12) \quad Y_j(\theta) = B_j(24; \theta D, (1 - \theta)E) - B_j(0; \theta D, (1 - \theta)E).$$

*For an experiment of  $N$  transfers we obtain a series  $\{Y_1, Y_2, \dots, Y_{N+1}\}$  and so define the total yield improvement  $\Delta Y(\theta) = Y_{N+1}(\theta) - Y_1(\theta)$ . The time of adaptation,  $t_{\text{adapt}}$ , is the interpolated time at which the bacterial yield improvement of the population reached half its maximum value. We say that the rate of adaptation of this bacterial population to this environment is*

$$(13) \quad \omega(\theta) = \frac{\Delta Y(\theta)}{2 \cdot t_{\text{adapt}}}.$$

*For an illustration, see supplement fig. S5; also see [5] for a related phenotypic measure of adaptation.*

Supplement fig. S6 shows the rate of adaptation as a function of the different degrees of synergy for each of the nineteen replicates of each combination treatment implemented in our experimental protocol. There are two important features of note: single-drug treatments (plotted as blue and green dots) are clustered in a region with low synergism, while multidrug combination treatments (plotted with red dots) present a high degree of synergism. Furthermore the figure shows a clear trade off: interactions with higher degrees of synergism possess higher rates of adaptation; this result is entirely analogous to one obtained earlier for different drug pairs [5].



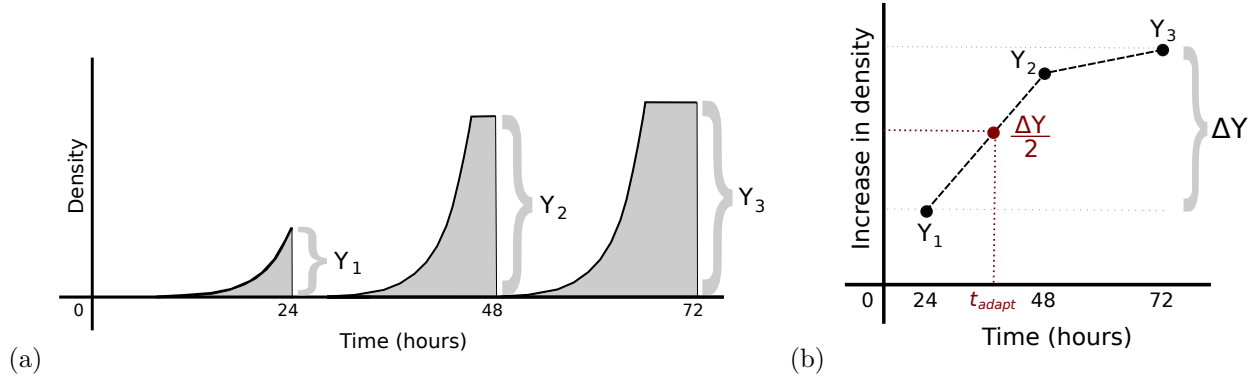

**supplement fig. S5** – (a) An illustration of a schematic three-season experiment with an increase in bacterial yield at the end of each transfer represented by the variable  $Y_j(\theta)$ . (b) The rate of adaptation is defined in terms of the yield improvement,  $\Delta Y(\theta)$ , and the time to achieve half its maximum difference,  $t_{adapt}$  as stated in (13).

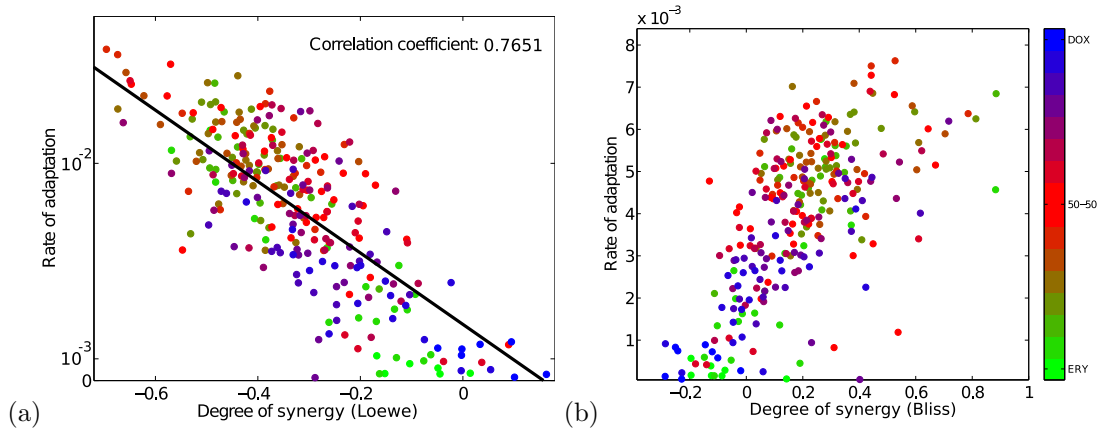

**supplement fig. S6** – A correlation between rate of adaptation and degree of synergy determined using (a) Loewe additivity (Definition 1 with  $r = 0.72$ ) and (b) Bliss independence (Definition 2). Independently of the definition of synergism used, multidrug combinations possess greater synergy and a higher rate of adaptation than treatments biased towards one drug with their necessarily lower degree of synergy (red dots represent near 50-50 combinations, blue dots represent doxycycline monotherapy and green dots erythromycin monotherapy).

**4.2. A measure of antibiotic efficacy: AUC inhibition.** The following measure of antibiotic efficacy takes into account the total bacterial density observed during a defined time interval in the presence and absence of drugs.

**Definition 4** (AUC inhibition). *Area under the curve inhibition at the end of day  $j$  is a measure of the fitness of bacteria relative to drug-free growth and expressed as a number between zero and one:*

$$(14) \quad \mathcal{A}(j; D, E) = 1 - \frac{\int_0^{24} B_j(t; D, E) dt}{\int_0^{24} B_j(t; 0, 0) dt}.$$

Hence  $\mathcal{A}(j; D, E) = 0$  when drugs have no effect and  $\mathcal{A}(j; D, E) = 1$  when the antibiotic combination has completely inhibited growth.

This measure is illustrated in supplement fig. S7.

**4.3. Smile-frown transition in the data.** The purpose of this section is to show that the smile-frown transition predicted by the logistic model (4) and depicted in supplement fig. S1 is found in the empirical dataset when *E.coli* K12(MC4100) is cultured in the presence of erythromycin and doxycycline using protocol Ex. 2.

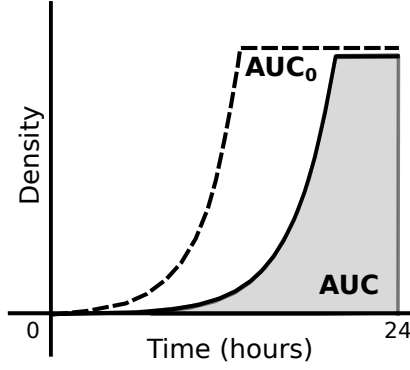

**supplement fig. S7** – The area under the curve measure of inhibition (*AUC inhibition*) on day  $j$  is determined by integrating the total observed bacterial density throughout the duration of the season (represented with a grey area and denoted  $AUC$ ) relative to the total observed bacterial density during the same time interval in an experiment with no antibiotics (area under the dotted line and denoted  $AUC_0$ ). In symbols, inhibition is given by  $\mathcal{A} = 1 - AUC/AUC_0$ .

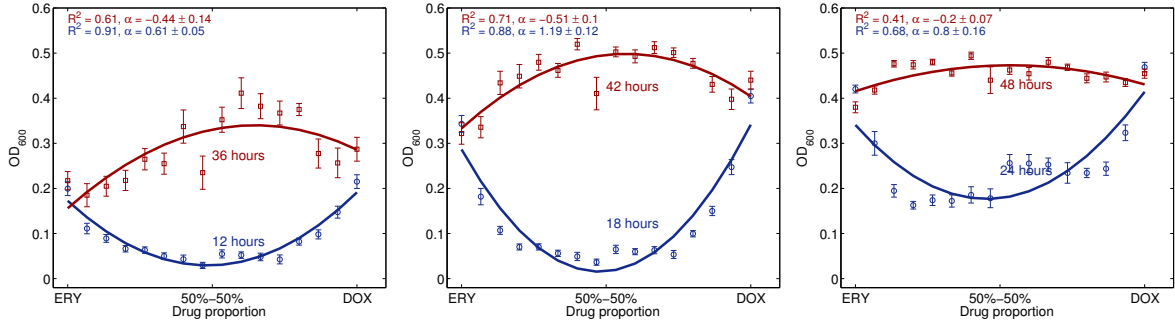

**supplement fig. S8** – (**Loss of the synergistic smile**) Each pane shows a quadratic fit to optical density data at times 12h, 18h, 24h (in blue) and 24h later at 36h, 42h and 48h (in red). The earlier times are consistent with a test for synergism, the later are consistent with antagonism; the test and  $p$  values are given in the text in section 4.3. The figure legends show unadjusted  $R^2$ , the fitted value of  $\alpha$  and its estimated standard error where the quadratic  $\alpha\theta^2 + \beta\theta + \gamma$  is fitted to data; as usual,  $\theta \in [0, 1]$  represents drug proportion on the x-axis.

The properties of synergy and antagonism as stated in Definition 1 are difficult concepts to apply directly to data as the variation inherent in any empirical observation of bacterial growth will mean that convexity or concavity of the population density data are unlikely to hold in practise. So, as to test for convexity or concavity in observed data, we fitted a quadratic  $q(\theta) = \alpha\theta^2 + \beta\theta + \gamma$  to those densities for at least six different times during the first 48 hours of growth and examined the sign of the coefficient  $\alpha$  (see supplement fig. S8). Motivated by the Definition 1 we take the convex case where  $\alpha > 0$  as an indicator of synergy and the concave case where  $\alpha < 0$  is an indicator of antagonism; a t-test is used for the significance of this sign condition.

Supplement fig. S8 illustrates the results obtained when applying this test. It shows that at 12h, 18h and 24h, the test is consistent with synergism with approximate  $p$  values for the positivity of  $\alpha$  of  $4.69 \cdot 10^{-8}$ ,  $2.476 \cdot 10^{-7}$  and  $2.475 \cdot 10^{-4}$  respectively. Twenty four hours later, at 36h, 42h and 48h the test is consistent with antagonism with respective  $p$  values  $9.33 \cdot 10^{-3}$ ,  $2.529 \cdot 10^{-4}$  and  $1.25 \cdot 10^{-2}$ . The  $R^2$  values of each fit are given in the figure legend. Thus, we conclude that the smile-frown transition occurs in the data before 48h of growth have elapsed, consistent with the model (4).

**4.4. A corollary of the smile-frown transition: when a monotherapy is optimal.** Equation (4) made a second prediction, not only is the smile-frown transition seen but it predicted that this transition is the result of the optimal therapy shifting from one timepoint to another. Moreover, at certain critical times the optimal therapy is predicted to move quite abruptly from being a combination therapy at early times to a monotherapy

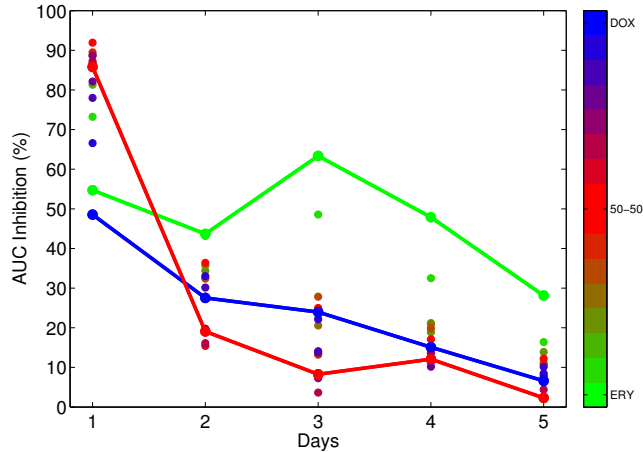

**supplement fig. S9** – The decline in inhibitory effect for each of the sixteen treatments, where three have been highlighted: green is the erythromycin monotherapy, blue is the doxycycline monotherapy and red is the maximally synergistic combination (as measured over 24h). A point arises around day two where the loss of inhibition is so rapid for the most synergistic treatment that it no longer provides the optimal therapy in this measure and a monotherapy is preferable.

at later times. This is illustrated in supplement fig. S1 and, as can be seen in supplement fig. S9, this prediction is also borne out by data.

Supplement fig. S9 shows that the inhibition of growth due to the most synergistic combination treatments rapidly declines, so much so that within a day the erythromycin monotherapy provides greater inhibition, so too the doxycycline monotherapy but the latter difference is less clear in the figure.

## 5. ANALYSIS: WHOLE GENOME SEQUENCING

**5.1. Genetic adaptation in evolved populations of *E. coli* K12 (MC4100).** To identify the genetic mechanism that accounts for the smile-frown transition that occurred during the evolution experiments, we sequenced the genomes of ten evolved populations of each single drug treatment (the one where  $E = 9\mu\text{g/ml}$  and the other where  $D = 0.15\mu\text{g/ml}$ ) and of the combination treatment with the largest synergy effect on day one (where  $E = 4.8\mu\text{g/ml}$  and  $D = 0.07\mu\text{g/ml}$ ). To ensure the genetic changes we identify are correlated with adaptation to antibacterial treatment, we also sequenced ten control populations that evolved under experimental conditions but were not exposed to any antibiotics. Finally, we re-sequenced the ancestral population to mitigate against possible inaccuracies or changes between our starting strain and published *E. coli* MC4100 genomes.

**5.2. DNA extraction and sequencing.** To obtain DNA, subsamples of bacterial cultures of day 4 (protocol Ex. 2) were taken by scratching the surface of frozen material with a pipette tip. The tip was used to inoculate 20 ml of M9 growth medium containing the respective antibiotic concentrations these replicates had encountered in the serial dilution experiment. The cultures were grown for 24h at  $30^\circ\text{C}$ , thus re-running day five of the experiment. Additionally, an LB overnight culture of the original agar plate colony (used for inoculation on the first day) was prepared for sequencing.

DNA was extracted using the DNeasy Blood & Tissue Kit (Qiagen, Hilden, Germany) according to the manufacturer’s instructions for Gram-negative bacteria. The 41 samples were processed into genomic paired-end Illumina sequencing libraries according to standard methods [6]. Sequences were obtained for the ancestral culture and for all replicates of the control, doxycycline and combination treatments. We only obtained sequences for six replicates of the erythromycin single drug treatment.

### 5.3. Data analysis.

*Error Correction and Quality Filtering.* All reads were error corrected using Quake 0.3.0 [7] using a kmer size of 15. Adapter sequences (AGATCGGAAGAGCACACGTC and AGATCGGAAGAGCGTCGTGT) were stripped using SeqPrep (<https://github.com/jstjohn/SeqPrep>). Reads were then quality trimmed from both ends, to exclude any bases of Phred quality score lower than 26 using DynamicTrim.pl from the SolexaQA

package 1.10 [8]. To exclude short and orphan reads and to maintain pairing of reads between the two fastq files, reads shorter than 40 were filtered out using LengthSort.pl from the same package.

*Mapping Onto Reference.* Reads of all samples were mapped to the published *E. coli* K12 (MC4100) reference genome [9], which is available for download at [ftp://ftp.ncbi.nih.gov/genomes/Bacteria/Escherichia\\_coli\\_BW2952\\_uid59391/](ftp://ftp.ncbi.nih.gov/genomes/Bacteria/Escherichia_coli_BW2952_uid59391/) (version NC\_012759.1, accessed January 2012). The reference sequence was saved in the fasta format and indexed using the index subroutine of bwa 0.6.1 [10]. Subsequently, reads were aligned to the reference using the bwa sampe module for paired end reads. Reads were also mapped with GSNAP. A GMAP/GSNAP database with kmer size 15 was created and reads were mapped with GSNAP [11] with an expected paired-end length of 300, allowing 50bp deviation of the expected paired-end length. Using samtools [12], the sam files resulting from both mappers were sorted to genomic position and filtered to include only reads mapped in a proper pair and aligned with a mapping quality greater than or equal to twenty. The sorted bam files were indexed and basic statistics were calculated using the flagstat option in samtools. Per-base coverage was calculated using genomeCoverageBed in Bedtools [13]. Coverage was further analysed in R and Bioconductor using the HilbertVis and ShortRead packages.

*Analysis of Structural Variation and SNPs.* To call single nucleotide polymorphisms (SNPs), duplicate reads were removed using the MarkDuplicates code of Picardtools (available at [www.picard.sourceforge.net](http://www.picard.sourceforge.net)). SNPs were called with SNVer 0.4.0 [14] and with VarScan 2.0 [15]. SNVer uses a frequentist approach to test whether a polymorphic genomic locus represents a rare variant present above a minor allele frequency (MAF) threshold. In our analysis the MAF was set to 0.05 and SNPs were only kept if they were supported by more than two reads. VarScan uses a heuristic/statistic method to call SNPs based on read depth, base quality, significance and variant frequency. In this analysis all detected variants with a minimal coverage of 50 were kept. The filtered SNPs were finally annotated using the published annotation file for *E. coli* K12 (MC4100) ([ftp://ftp.ncbi.nlm.nih.gov/genomes/Bacteria/Escherichia\\_coli\\_BW2952\\_uid59391/NC\\_012759.gff](ftp://ftp.ncbi.nlm.nih.gov/genomes/Bacteria/Escherichia_coli_BW2952_uid59391/NC_012759.gff)) and a Perl script.

Structural variants were detected using Breakdancer [16], CNVnator [17] and Pindel [18]. Breakdancer detects structural variants based on anomalous location and/or orientation of read pairs. Using the breakdancer\_max algorithm, all sorted bam alignment files were screened for indels, deletions, insertions, inversions and intrachromosomal rearrangements. Deletions, insertions and intrachromosomal rearrangements were kept if they received a score larger than 35 and were supported by at least 5 reads; for inversions, a quality score of 30 was considered sufficient. The Pindel pattern-growth algorithm detects breakpoints of large deletions and medium sized insertions by identifying paired reads for which only one of the reads can be mapped to the reference. It then attempts to break the unmapped read into two and map both shorter fragments to the reference. If successful, the breakpoints of deletions or insertions can thus be determined. CNVnator utilises statistical analyses of read mapping density (i.e., coverage) within different bins along the genome to discover copy number variants of any size. After calibration, a bin size of 100 was chosen for all CNVnator analyses.

**5.4. Summary of results.** All SNP and structural variation analyses were first performed on the ancestor. This strain had 59 deletions (among which one large 49.2 Kb deletion) and 18 SNPs compared to the published reference (cited above). In the control treatment six SNPs, four deletions and one inversion were found in four genes. These likely represent adaptations to the growth conditions and were therefore filtered from the results for the other treatments. The doxycycline samples showed 11 SNPs and five 1-12bp deletions in five genes specific to the treatment (Table S1), whereas the analysis of the erythromycin replicates yielded three unique SNPs and 4 unique deletions in two genes (Table S1). In the combination treatment only one sample showed unique SNPs in two genes. Additionally to SNPs, the analysis detected a 315Kb duplication between genome positions 274201 and 589900 (supplement fig. S10). This duplication was found in 90% of all combination replicates, but also in 30% of the doxycycline and 30% of the erythromycin treatments.

*Genetic basis of adaptation.* The above genomic analyses have yielded evidence for genetic adaptation to drug treatment. Populations adapted differently to single drug treatments than combination treatment but generally followed the same evolutionary routes across independent biological replicates within a treatment.

In the doxycycline treatment, 60% of the replicate populations became resistant through SNPs (Table S1) and/or 1-14bp deletions in the *marR* negative regulator of the *marRAB* operon ([19, 20], for a review of *mar*, see [21]). The Multiple Antibiotic Resistance (*mar*) locus mediates resistance to tetracyclins, chloramphenicol,

| Gene                | Number of polymorphic sites | Frequency in replicates | Annotation                                                                                                            |
|---------------------|-----------------------------|-------------------------|-----------------------------------------------------------------------------------------------------------------------|
| <b>Doxycycline</b>  |                             |                         |                                                                                                                       |
| <i>marR</i>         | 7                           | 0.5                     | Repressor of <i>marRAB</i> operon (latter involved in activation of antibiotic resistance and oxidative stress genes) |
| <i>mdaB</i>         | 1                           | 0.1                     | NADPH quinone reductase                                                                                               |
| <i>agaS</i>         | 1                           | 0.1                     | tagatose-6-phosphate ketose / aldose isomerase                                                                        |
| <i>ascF</i>         | 1                           | 0.1                     | phosphotransferase system IIC components (carbohydrate transport)                                                     |
| <i>eco</i>          | 1                           | 0.1                     | serine protease inhibitor                                                                                             |
| <b>Erythromycin</b> |                             |                         |                                                                                                                       |
| <i>acrR</i>         | 1                           | 0.2                     | <i>acrRAB</i> regulator (antibiotic transporter operon)                                                               |
| <i>ycbZ</i>         | 2                           | 0.6                     | ATP-dependent protease posttranslational modification                                                                 |
| <b>Combination</b>  |                             |                         |                                                                                                                       |
| <i>rcnA</i>         | 1                           | 0.1                     | membrane protein conferring nickel and cobalt resistance                                                              |
| <i>evgS</i>         | 1                           | 0.1                     | hybrid sensory histidine kinase in two-component regulatory system                                                    |

**Table S1** – Overview of single nucleotide polymorphisms in the genomes of *E. coli* that evolved five days with erythromycin, doxycycline or a combination of both. The number of polymorphic sites indicates how many independent nucleotide positions in the gene carry a SNP in at least one replicate. The frequency reflects the number of replicates where a polymorphism in the gene was found. The table only shows SNPs unique to the three treatments.

penicillins, cephalosporins, nalidixic acid and rifampicin through an energy-dependent efflux system [22]. Specifically, MarA transcriptionally activates at least 60 genes [23, 24, 25] that affect outer membrane permeability, antibiotic efflux and the reducing potential of the cell. Mutations that render the negative regulator MarR inactive have been found scattered across the gene and resulted in an increased efflux of antibiotics (see the overview in [26] and references therein). This *mar*-related mechanism is well-described as a genetic adaptation conferring resistance to tetracyclins.

In the erythromycin treatment, most replicates had a SNP or deletion in the *ycbZ* gene involved in translational modification (*ycbZ* is a putative protease). One replicate population obtained a mutation in *acrR*, the negative regulator of the *acrAB* multidrug efflux system. The *acrAB* locus is known to be one of the most important broad substrate efflux pumps in *E. coli* [27, 20, 28]. Deletion of this operon leads to hypersensitivity to antibiotics, detergents and dyes [29, 20], indeed Mazzariol and coworkers [30] showed that high-level resistant clinical isolates of *E. coli* over-expressed *acrA*.

In 90% of the populations in the combination treatment, but also in 30% of the erythromycin and 30% of the doxycycline treatments, a 315 Kb duplication was found (see supplement fig. S10). The duplication was observed significantly more for the combination treatment than in the erythromycin (Fisher’s exact test,  $P=0.035$ ) and the doxycycline (Fisher’s exact test,  $P=0.019$ ) treatments. All 14 replicates where a duplication was detected were consistently between positions 274201 and 589900. This genomic region contains 293 genes, among which eleven known antibiotic resistance genes, 32 transporter genes and 31 transposon-related genes (Appendix B).

Three multidrug efflux systems and an antibiotic degradation system are encoded in the duplicated region (again, see Appendix B). Nicoloff *et al.* showed [31] that a multi-drug resistant isolate of *E. coli* gained antibiotic resistance through a 149 Kb duplication of a region including the *acrAB* locus. Artificial reduction of the copy number of *acrAB* lead to loss of the resistant phenotype but introduction of the duplicated region into a strain lacking the *acrAB* locus did not lead to sufficient AcrAB copy number to reach resistance. The role of spontaneous tandem duplications containing *acrAB* was later confirmed in several other *E. coli* strains [32].

The consistent parallel evolution towards a 315 Kb duplication here in all but one replicate of the combination treatments strongly suggests, therefore, that genetic amplification of multi-drug efflux pumps such as *acrAB* is the likely adaptation that confers the multi-drug resistance phenotype.

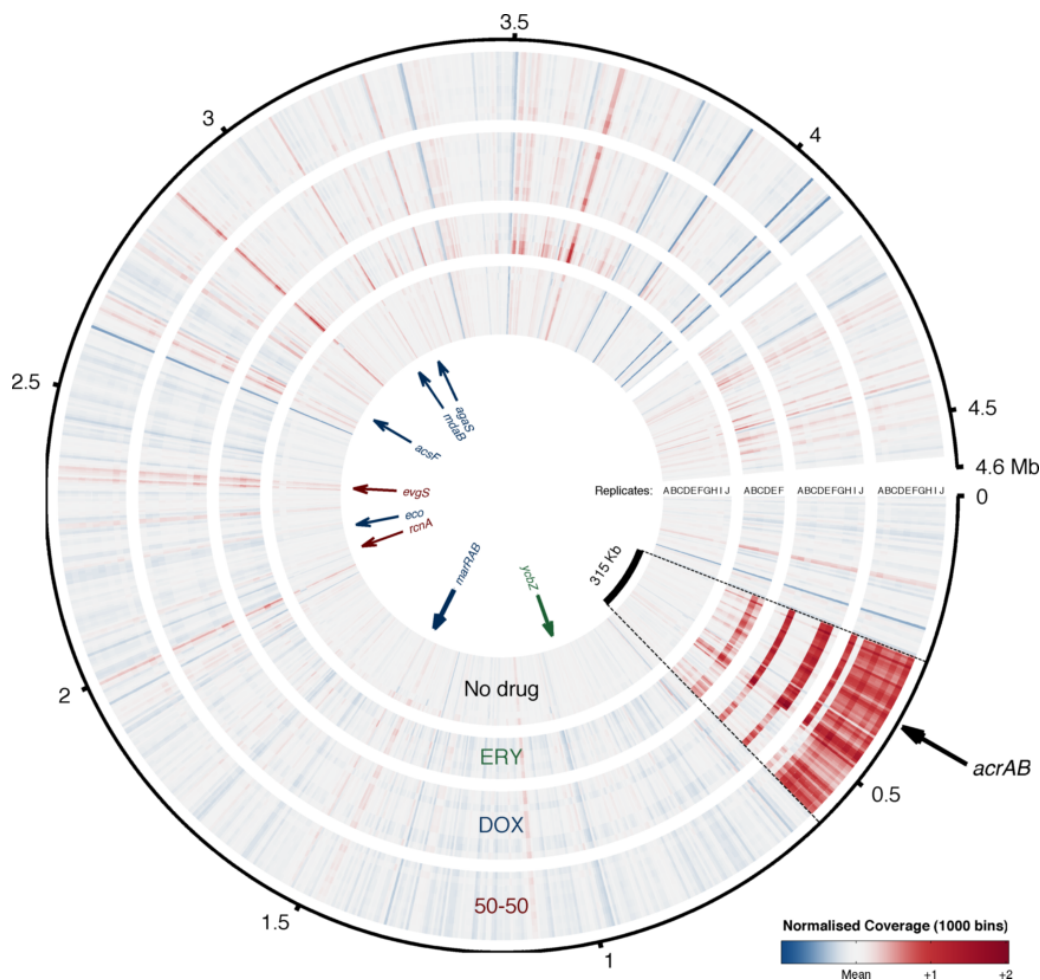

**supplement fig. S10** – Coverage plots for the genomic region between positions 274,201bp and 589,900bp showing the duplication detected by CNVnator and breakdancer, an increase in coverage suggestive of a duplication of that region. It shows no duplications were detected in the absence of drugs but more duplications of the region were detected in replicates of the combination therapy than in monotherapies. These are indicated by the reddest regions. The arrows are colour-coded and highlight SNPs in different treatments, the thickness of the arrow denotes how many replicates that SNP was found in.

## 6. ANALYSIS: A MATHEMATICAL MODEL CONSISTENT WITH DATA

The remainder of this document seeks to establish whether gene duplication of efflux genes underpins the genetic basis of the smile-frown transition. To this end, we now turn to mathematical models to ask whether the loss or gain of efflux genes in a model can produce the loss, or gain, of the transition.

**6.1. A core growth inhibition model: capturing dose-response curves.** Bacteriostatic antibiotics suppress bacterial growth by inhibiting DNA replication, RNA transcription or by interfering with protein synthesis and other aspects of cellular metabolism and physiology. For instance, both drugs in our experimental system target different subunits in the ribosome: *erythromycin* binds to the 50S ribosomal subunit and *doxycycline* to the 30S ribosomal subunit. Although they have different specific targets their mode of action is superficially similar, both suppressing cell growth by inhibiting protein translation.

The core growth-inhibition model presented in this section will use this observation to support the following modelling assumption: antibiotics act by inhibiting the production of an essential metabolite and therefore reduce flux through a pathway, thus reducing growth rate. While this is a vast over-simplification of the true cellular biology, this assumption will at least provide us with some broad insights into how two bacteriostatic antibiotics interact when they inhibit growth.

Cells were cultured in an environment in which glucose is limiting. We therefore assume for modelling purposes that the rate of cell growth is simultaneously proportional to the rate of translation and to the uptake

rate of glucose at extracellular concentration  $S$ . If we also assume that the antibiotic molecule has no effect on the uptake of the limiting resource, the growth rate  $G$  of a cell in which the extracellular concentration of a drug is  $D$  may then be written in the form  $G(S, D) = \text{constant} \times u(S) \times \gamma(D)$ . Here the constant represents cell yield per unit resource, glucose,  $u(S)$  is the uptake rate of glucose and  $\gamma(D)$  is a dimensionless growth inhibition function. We now assume that  $u(S)$  is a standard Monod function,

$$(15) \quad u(S) = \frac{V_{\max} S}{K + S},$$

where  $V_{\max}$  is maximal resource uptake rate and  $K$  a half-saturation constant.

The decrease in growth rate due to the presence of antibiotic will be described by an inhibition function of the form

$$(16) \quad \gamma(D) = \frac{1}{1 + \kappa_d D},$$

for some parameter  $\kappa_d \geq 0$  that can be a phenotype of each cell. Note that  $\kappa_d$  is a single-cell measure of antibiotic efficacy in the sense that if  $D_{50}$  is the antibiotic concentration required to halve the translation rate then  $D_{50} = 1/\kappa_d$ . As a result, we assume that the per-cell, per-unit time growth rate of each bacterial type is determined both by the resource availability,  $S$ , and by the concentration of the antibiotic,  $D$ , and a resource conversion parameter,  $c$ , as follows:

$$(17) \quad G(S, D) = c \cdot u(S) \gamma(D).$$

Our experimental microcosm, the shaken 384-well plates described in section 3, can have a relatively high concentration of bacteria per unit of volume. However, as the plates are shaken continually and vigorously, we will assume that the bacteria diffuse in the liquid medium in such a way that it is possible to describe antibiotic and carbon uptake using models based on the mass action law, as described by the following system of differential equations:

$$(18) \quad \frac{d}{dt}B = G(S, D) \cdot B, \quad \frac{d}{dt}S = -u(S) \cdot B, \quad \frac{d}{dt}D = -dD \cdot B,$$

suitably augmented with initial conditions  $(B(0), S(0), D(0))$ . Here  $B$  represents the density of bacteria in the growth medium and  $d$  represents the rate of uptake of antibiotic molecules from the environment due to their binding to bacterial cells.

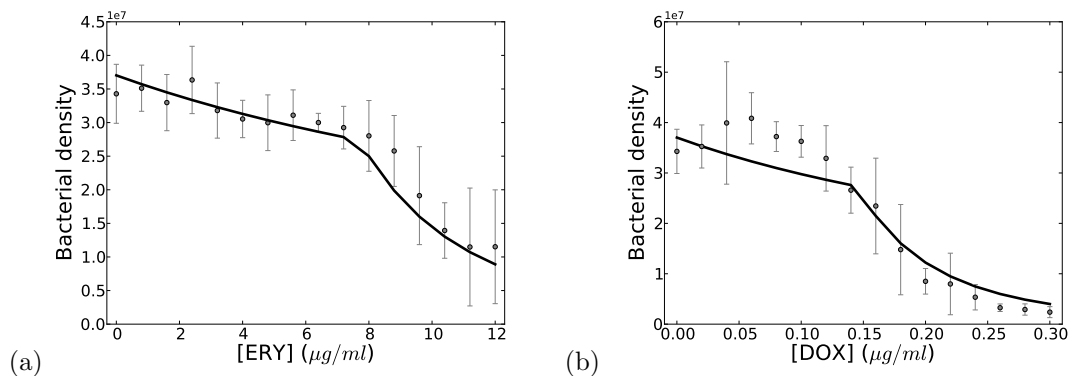

**supplement fig. S11** – Dose-response curves of *E. coli* K12(MC4100) exposed to different concentrations of (a) erythromycin and (b) doxycycline. Circles represent data and lines are model simulations (ie. equations (18) with parameters as described in Appendix A; vertical lines are s.e.).

Many simplifying assumptions were used to formulate equation (18). So, in order to validate this core growth-inhibition model, we performed numerical simulations with parameter values described in Table S3 and compared the model with data obtained by culturing *E. coli* for 24h under glucose limitation and subject to increasing concentrations of erythromycin and doxycycline. As can be seen in supplement fig. S11, the model was able to capture quantitative features of the dose-response curve to both drugs. Following the experiments, the model used a glucose value of  $S(0) = 2000 \mu\text{g/ml}$  and the value of  $D(0)$  can be read from the x-axis of supplement fig. S11 where ‘D’ in this model represents both drugs, doxycycline and erythromycin, in either case.

**6.2. Modelling synergistic drug interactions.** Having successfully captured single-drug dose-response profiles using a core mathematical model, we now return to the situation where two antibiotics are present in the environment at concentrations  $D$  and  $E$ . A natural extension of the model presented in the previous section may be obtained by supposing that growth inhibition can be described by a dimensionless function that depends on the concentrations of both drugs,  $\gamma(D, E)$ .

In a general sense,  $\gamma(D, E)$  must be a function satisfying

$$\gamma(0, 0) = 1, \gamma(D, E) \geq 0, \gamma(D, 0) = \gamma_d(D) \quad \text{and} \quad \gamma(0, E) = \gamma_e(E),$$

where  $\gamma_d(D)$  and  $\gamma_e(E)$  are growth inhibition functions that characterise the use of each antibiotic separately. Motivated by the action of doxycycline and erythromycin, we assume that the drugs have non-overlapping targets on a single enzyme and that we can model their interaction as a simplification of a model of mutually non-exclusive competitive inhibitors. As a result, the combined effect of the drugs  $D$  and  $E$  are assumed to have the following functional form

$$(19) \quad \gamma(D, E) = \frac{1}{1 + \kappa_d D + \kappa_e E + \kappa_m D E},$$

where  $\kappa_d, \kappa_e$  and  $\kappa_m$  are constant and strictly positive.

To see that the function  $\gamma(D, E)$  so-defined yields a *synergistic* interaction in the sense defined in inequality (6), let  $\theta$  lie between 0 and 1 and suppose that  $D_0$  and  $E_0$  have been chosen so that  $\gamma(D_0, 0) = \gamma(0, E_0)$ . From this we deduce that  $\kappa_d D_0 = \kappa_e E_0$  must hold. Differentiating  $\gamma(\theta D_0, (1 - \theta)E_0)$  with respect to  $\theta$  gives

$$\begin{aligned} \frac{\partial}{\partial \theta} \gamma(\theta D_0, (1 - \theta)E_0) &= - (1/\gamma(\theta D_0, (1 - \theta)E_0))^2 \cdot (\kappa_d D_0 - \kappa_e E_0 + (1 - 2\theta)\kappa_m D_0 E_0) \\ &= - (1 - 2\theta) (1/\gamma(\theta D_0, (1 - \theta)E_0))^2 \kappa_m D_0 E_0 \end{aligned}$$

which changes from negative to positive values when passing through  $\theta = 1/2$ . Hence the function  $\gamma(\theta D_0, (1 - \theta)E_0)$  is monotonic decreasing for  $\theta$  in  $(0, 1/2)$  and monotonic increasing in  $(1/2, 1)$  with maxima at both boundaries,  $\theta = 0$  and  $\theta = 1$ . Furthermore, a short calculation shows that

$$\frac{\partial^2}{\partial \theta^2} \gamma(\theta D_0, (1 - \theta)E_0) = 2\kappa_m D_0 E_0 \gamma(\theta D_0, (1 - \theta)E_0)^{-2} \left( (1 - 2\theta) \cdot \gamma^{-1} \cdot \frac{\partial}{\partial \theta} \gamma + 1 \right).$$

As  $(1 - 2\theta) \cdot \frac{\partial}{\partial \theta} \gamma$  is positive, we deduce that  $\frac{\partial^2}{\partial \theta^2} \gamma > 0$  and so  $\gamma(\theta D_0, (1 - \theta)E_0)$  is convex as a function of  $\theta$ . The function  $\gamma(\theta D_0, (1 - \theta)E_0)$  therefore satisfies the synergy property required for inhibition functions set out in Definition 1 (ie. the required convexity property holds), justifying our claim of synergy for  $\gamma$ .

We can now give a mathematical form for bacterial growth rate,  $G$ , in terms of the concentration of available limiting resource and the concentration of both antibiotics in the environment. This is a standard Michaelis-Menten term multiplied by the growth inhibition coefficient defined in (19):

$$(20) \quad G(S, D, E) = c \cdot u(S) \cdot \gamma(D, E).$$

As for one-drug models presented earlier,  $c$  denotes a resource conversion rate and  $u(S)$  is the resource uptake function defined in (15). If we now write  $B(t)$  for the density of an isogenic population of bacteria growing under resource limitation and under the effect of the antibiotics, at concentrations  $D(t)$  and  $E(t)$ , then the equation governing the dynamics the bacterial density can be written thus:

$$(21) \quad \frac{d}{dt} B = G(S, D, E) \cdot B, \quad \frac{d}{dt} S = -u(S) \cdot B, \quad \frac{d}{dt} D = -d D \cdot B, \quad \frac{d}{dt} E = -e E \cdot B,$$

with initial conditions  $\mathbf{x}(0) = (B(0), S(0), D(0), E(0))$ . Here the affinity constants,  $d$  and  $e$ , are mass action constants that represent the binding and uptake rates of the antibiotic molecules to the bacterial cells.

Using the parameter values described in Table S3, the model defined by (21) is seen in supplement fig. S12 to be consistent with an empirically-determined bacterial inhibition dataset obtained by culturing the bacteria at different drug proportions for 24-hours. This figure establishes that monotherapies produce an AUC measure of 50%, whereas a 50-50 combination therapy of both drugs produces a reduction in AUC growth of nearly 90%. This also establishes that the interaction of the drugs is synergistic when measured over a twenty-four hour period.



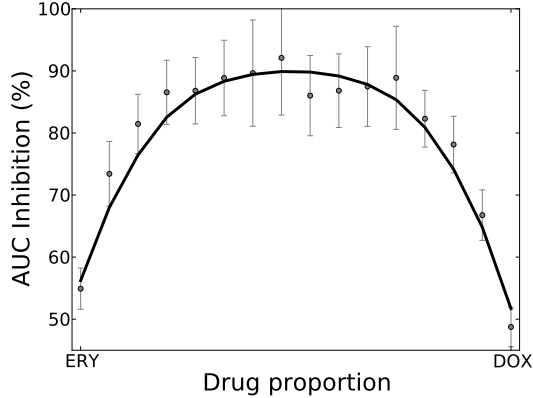

**supplement fig. S12** – Area under the curve inhibition of *E. coli* K12 (MC4100) cultured for 24h under glucose limitation and different proportions of erythromycin and doxycycline. Solid lines are simulations of the mathematical model (21) with parameter values defined in Table S3, vertical bars are one s.e..

**6.3. A mathematical model structure to mimic the experimental protocol.** Suppose that  $\mathbf{B}(t) = (B^1(t), \dots, B^n(t))$  is a vector containing the density of  $n$  bacterial genotypes supported by the model at time  $t$ ; the meaning of the different bacterial genotypes will be defined carefully in due course. The first entry of this vector represents the density of a wild-type bacterium in the experimental device and as the initial stage of the experiment is to inoculate the first flask with an isogenic population consisting only of wild-type bacteria at density  $B_0$ , we assume that  $\mathbf{B}(0) = (B_0, 0, \dots, 0)$ . The value  $B_0$  is approximately  $10^4 - 10^5$  cells per ml in practise.

If the experimental protocol invokes  $N$  flask-to-flask transfers, each represented by an index  $j \in \{1, N + 1\}$ , then the density of each bacterial genotype at transfer  $j$  is determined by the terminal densities from the previous day. If the duration of each transfer is  $T$  hours and in practise  $T = 24h$ , then the density of each bacterial genotype within the  $j$ -th day will be written  $\mathbf{B}_j(t)$  for  $0 \leq t \leq T$ . As a consequence of the nature of the experimental protocol, in particular (11), the initial condition within each transfer will satisfy the condition  $\mathbf{B}_j(0) = \eta \cdot \mathbf{B}_{j-1}(T)$ , where  $0 < \eta < 1$  is a dilution parameter.

Let us represent the state of the experimental system by the variable  $\mathbf{x}_j(t) = (\mathbf{B}_j(t), S(t), D(t), E(t))$ , where  $D$  and  $E$  are the concentrations of erythromycin and doxycycline and  $S$  is the limiting resource, glucose. A general, mathematical structure representing a population of *E. coli* competing in a single resource-limited environment and subject to the inhibiting effect of two bacteriostatic antibiotics can be written as follows:

$$(22a) \quad \frac{d}{dt} \mathbf{x}_j = \mathcal{F}(\mathbf{x}_j)$$

(where  $\mathcal{F}$  is a model-specific mapping detailed below) with initial conditions

$$(22b) \quad \mathbf{x}_j(0) = (\eta \cdot \mathbf{B}_{j-1}(T), S_0, \theta D_0, (1 - \theta)E_0)$$

within each season where  $\mathbf{x}_1(0) = (\mathbf{B}(0), S_0, \theta D_0, (1 - \theta)E_0)$ . Here  $D_0$  and  $E_0$  are basal concentration of the two antibiotics and  $S_0$  is the initial concentration of the limiting resource within each season. There remains to specify the nature of the function  $\mathcal{F}$ .

**Remark 2.** *The time series  $\mathbf{x}_j(t)$  depend implicitly on  $\theta$  through the definition of the initial condition within each transfer (although  $\mathcal{F}$  does not itself depend on  $\theta$  directly). To emphasise this dependence later in the article, we will use the notation  $\mathbf{x}_j(t; \theta)$ .*

**6.4. A drug efflux model.** To complete the construction of a the model, we assume that a protein is synthesised that interacts physically with the drug. This protein could in principle have several functions, the one we assume here is a passive efflux mechanism whereby the small antibiotic molecule is transported into the extracellular environment by one or more of these proteins. We could, with a small number of modifications, assume the protein is instead an enzyme that hydrolyses the antibiotic into a number of products that are harmless to the cell. However, we choose drug efflux for definiteness motivated by the fact that *acrAB* was found within the duplicated chromosomal region as highlighted by the above genomic analysis.

That part of our mathematical model which represents the dynamics within one season is defined as follows (this defines the function  $\mathcal{F}$  above):

$$(23a) \quad \frac{d}{dt}b_1 = G(S, D_1, E_1)b_1 - \delta(b_1 - (1 + \Delta)b_2),$$

$$(23b) \quad \frac{d}{dt}b_j = G(S, D_j, E_j)b_j - \delta((2 + \Delta)b_j - b_{j-1} - (1 + \Delta)b_{j+1}),$$

$$(23c) \quad \frac{d}{dt}b_n = G(S, D_n, E_n)b_n - \delta((1 + \Delta)b_n - b_{n-1}),$$

$$(23d) \quad \frac{d}{dt}S = -\frac{VS}{K+S} \sum_{j=1}^n b_j,$$

$$(23e) \quad \frac{d}{dt}D_{\text{ext}} = -d_D D_{\text{ext}} - \sum_{j=1}^n b_j \left( \varphi_d(D_{\text{ext}} - D_j) - \frac{v_d p_j}{k_d + p_j} D_j \right),$$

$$(23f) \quad \frac{d}{dt}D_j = -d_D D_j + b_j \left( \varphi_d(D_{\text{ext}} - D_j) - \frac{v_d p_j}{k_d + p_j} D_j \right),$$

$$(23g) \quad \frac{d}{dt}E_{\text{ext}} = -d_E E_{\text{ext}} - \sum_{j=1}^n b_j \left( \varphi_e(E_{\text{ext}} - E_j) - \frac{v_e p_j}{k_e + p_j} E_j \right),$$

$$(23h) \quad \frac{d}{dt}E_j = -d_E E_j + b_j \left( \varphi_e(E_{\text{ext}} - E_j) - \frac{v_e p_j}{k_e + p_j} E_j \right),$$

where  $j = 2, \dots, n-1$ .

The model in (23) is designed to capture the densities of bacteria that carry  $j$  copies of a gene coding a protein that transports drug from the cell, we denote this density by  $b_j$ . Using  $t$  for time, the variable  $S$  is the concentration of a limiting carbon source, glucose,  $D_{\text{ext}}$  and  $E_{\text{ext}}$  are extracellular concentrations of each drug and  $D_j$  and  $E_j$  are the intracellular drug concentrations for each subpopulation. The drugs are assumed to degrade at an exponential rate determined by  $d_D$  and  $d_E$ . The variable  $p_j$  encodes the number of efflux proteins expressed from a cell with  $j-1$  copies of the efflux gene, provided  $j \geq 2$ , we then impose the conditions  $p_1 = 0$  and  $p_2 > 0$ . This means that cells with one gene copy must first express it before the drugs can be pumped from the cell, thereafter that gene may be amplified.

We assume a functional form for  $p_j$  that is monotone increasing and bounded in  $j$ , controlled by a dimensionless constant  $g$  (the Michaelis-Menten function  $p_j = (j-1)/(1+g(j-1))$ ). Thus  $p_j$  is also dimensionless and the quantity  $p_j/(k_e + p_j)$  is the probability of finding a pump in the state where it momentarily is bound to drug. The rationale for this is that the polymerase transcription complex, assumed limited in number, has to compete for each gene copy, thus providing a limit on the number of efflux genes that can be simultaneously expressed. Thus the cell phenotype for which  $j=1$  has the gene for drug efflux, but does not express it.

The process of up-regulation of efflux genes and both increases and decreases in the copy number of the efflux genes are assumed to occur randomly as a Poisson process at a certain rate  $\delta$  per cell per hour (the probability of expression and amplification of the gene per cell per unit time are assumed, for simplicity, to be the same).

The remaining variables in (23) have the following meaning:  $\varphi_e, \varphi_d$  are antibiotic diffusion rates across the cell membrane,  $v_e, v_d$  are maximal antibiotic efflux rates and  $k_e, k_d$  are half-saturation constants associated with efflux pump-antibiotic molecule binding;  $V$  and  $K$  are maximal uptake rate and half-saturation constants associated with Michaelis-Menten uptake of the single carbon source, glucose  $S$ ;  $G(S, D, E)$  is the per hour growth rate of each cell detailed above;  $\delta$  is the rate of amplification of the efflux gene and  $\delta(1 + \Delta)$ , a value necessarily greater than  $\delta$ , is the rate of decay of the efflux protein expressed by this gene. Finally, therefore,  $n-1$  is the maximum copy number of the gene.

To complete the statement of the model, we set  $n=3$  to represent three different cell phenotypes: an unexpressed pump gene, a single expressed pump gene and one additional copy of that gene where both copies are fully expressed. (In supplement fig. S13 these cell types are referred to in the figure legend as ‘no pump’, ‘pump’ and ‘gene copy’, respectively.) Finally, at the end of each 24-hour season a sample of the current population is transferred to fresh medium where the next season of growth occurs. A sample of around 1% of the bacterial population was therefore taken and transferred to a fresh environment. The intracellular drug concentrations (per cell) were maintained in this transfer but the extracellular environment was reset to provide the growth and environmental dynamics seen in supplement fig. S13. This was repeated for five days (120h total growth) to respect the experimental protocol.

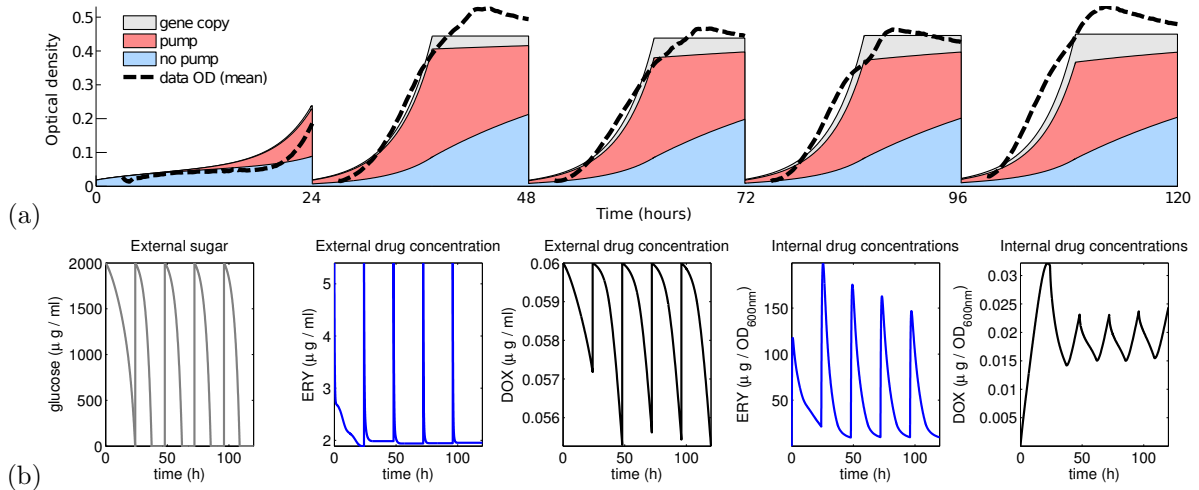

**supplement fig. S13** – One simulation of the drug efflux model over five days (seasons of 24h) totalling 120h for a drug combination given by  $\theta = 6/14$  corresponding to  $D = 0.06\mu\text{g}/\text{ml}$  and  $E = 5.4\mu\text{g}/\text{ml}$ . (a) The densities of each phenotype (red, blue and grey areas) sum to form the total population density that is compared with mean observed optical density data (dotted black line). In simulations, the pump and its gene copy are selected for in the growth phase, but are selected against in stationary phase. (b) The drug and sugar concentrations sweep downwards from their highest values at the start of each new season where the bacterial densities and extracellular environments have been reset to their initial ( $t = 0$ ) values.

Dynamics from the first two days' simulation of both the model and of the data have been sampled to produce supplement fig. S14. This figure shows that the drug efflux model and the data are quantitatively consistent and, according to the model, we do indeed find that the interaction profile between erythromycin and doxycycline has morphed from a synergistic to antagonistic form within a matter of hours.

For completeness we provide supplement fig. S15 which shows that while the transition from a synergistic to antagonistic interaction profile occurs on the second day of the experiment, thereafter the profile continues to be one of progressively weaker antagonism.

**6.5. Theoretical prediction: synergy is stabilised if the efflux pump is suppressed.** Each cell genotype in (23a-c) has the same absolute fitness,  $G(S, D, E)$ , with its synergistic dependence on  $D$  and  $E$ , each cell also has the same uptake rate of limiting resource. What differs between the cell types is the concentration of drug within each cell due to the number of pumps the cell produces. From our assumptions, it follows that there are no fitness costs of being drug-resistant in this model, the production of the efflux protein is assumed to carry no cost either in terms of growth rate or growth yield.

As the expression and amplification of the efflux pump genes can be prevented in (23) by setting  $\delta = 0$ , after effecting such a change it follows that (23) can only support one cell phenotype (under our assumptions) whose growth is described completely by the function  $G(S, D_1, E_1)$ . As this function is, by its very design, known to synergise with respect to the two drugs because  $G(S, \theta D_1, (1 - \theta)E_1)$  is convex as a function of  $\theta$ , it follows that the drug interaction predicted by equation (23) must be synergistic for all times. We deduce that it is the superposition of different resistant sub-populations that eventually emerge if  $\delta > 0$  that combine to produce the loss of synergy seen in data as illustrated in supplement fig. S14.

As a further illustration, we reproduced the bottom-left pane of supplement fig. S14 but after setting  $\delta = 0$  (with all the other parameters as stated in Table S4). When we made this one change, the difference in the modelled drug interactions between twelve and thirty six hours can be seen in supplement fig. S16. Note in particular how the drug synergy persists to later times after effecting this change. Such an artificial suppression of the efflux pump, akin to a loss of function mutation in the pump gene, ensures that the designed drug synergy is a stable property of the model that leads to a continual decline in population size as the treatment proceeds.

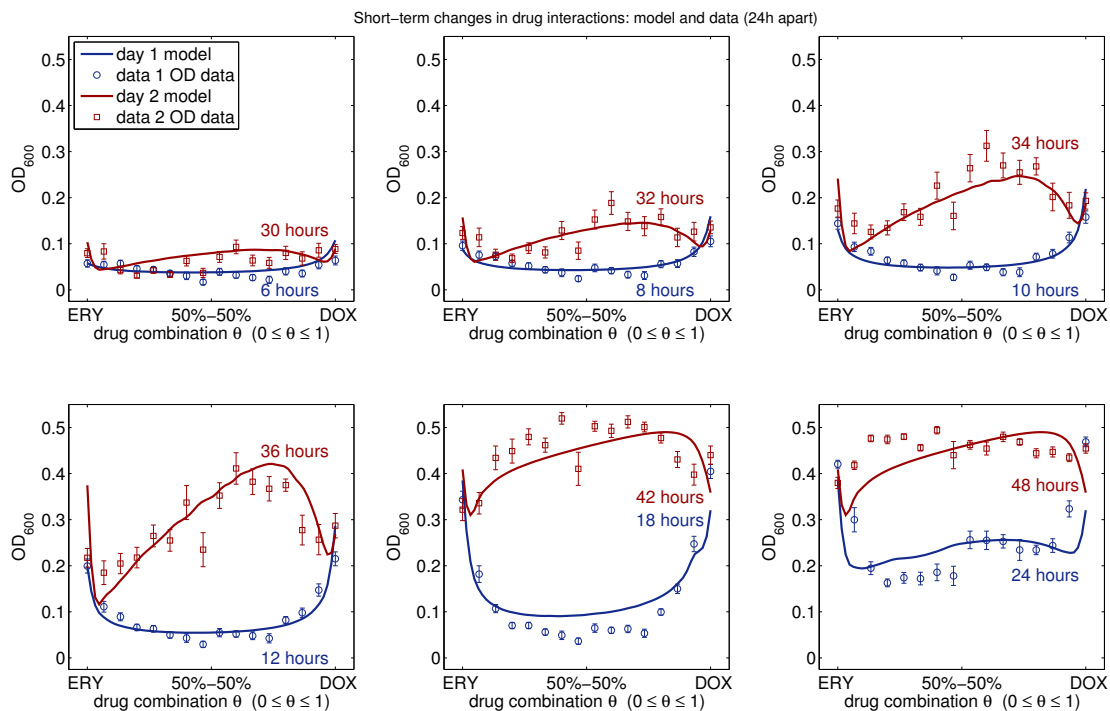

**supplement fig. S14** – The transition from a synergistic to antagonistic drug interaction profile can be seen in optical density data illustrated here at different times 24h apart. The outcome of the model (unbroken lines) is superimposed upon the mean observed data (broken lines and squares; bars indicate s.e.). Until 18h the model indicates a convex interaction profile consistent with synergy (blue), beyond 30h the model combination therapies have a near-concave profile consistent with antagonism (red).

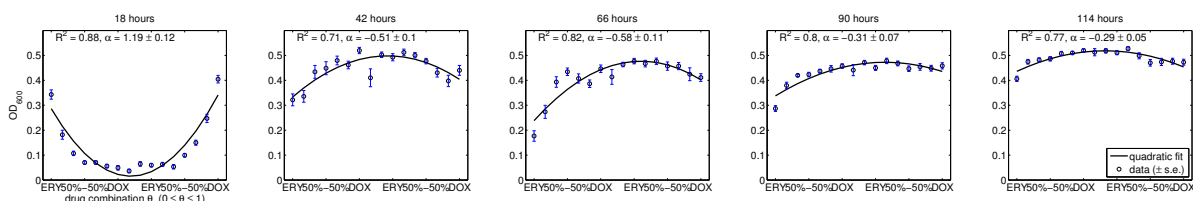

**supplement fig. S15** – The smile-frown transition from day one to day two is preceded by an antagonistic profile until the end of day five, with the strength of the antagonism decaying each day, as this figure shows (at hour 18 each day). The parameter value associated with the  $\alpha$  test is provided in each figure window.

## 7. VALIDATING THE THEORY: TESTING THE SMILE-FROWN EXPERIMENT WITH AN *acrAB* KNOCKOUT

Our analysis of the mathematical model has thus provided a clear prediction: in the absence of key drug resistance genes, the ‘smile’ we associate with drug synergy will be stabilised as shown in supplement fig. S16. The purpose of this section is to test this.

**7.1. Additional experimental details.** Since a large duplication was found significantly more often for the combination rather than any of the other treatments, at least one of the duplicated genes may account for the smile-frown transition. One of the candidates is the *acrAB* operon which is responsible for expression of the *acrAB-tolC* multidrug efflux pump. We ran a second serial dilution experiment, namely Ex. 2, in which we compared the strain *E. coli* AG100 with the corresponding deletion mutant for the *acrAB* operon (*E. coli* ( $\Delta$ *acr*)). Otherwise, media and drugs were exactly as Ex. 2.

Having resolved a large duplication present in significantly more of the replicated treatments where a drug combination treatments was implemented when compared to the single drug treatments, the genomics indicated that the *acrAB-tolC* multidrug efflux system was likely to play a significant role in the smile-frown transition. We thus chose to treat this as a candidate mechanism and ran another serial dilution experiment, namely Ex. 2,

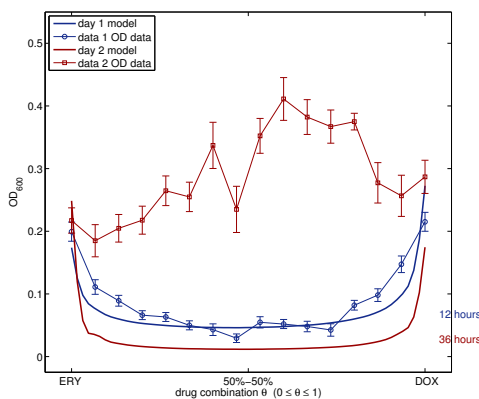

**supplement fig. S16** – A theoretical model with just one drug-susceptible phenotype in which the efflux mechanism has been suppressed in the model (we set  $\delta = 0$ ): drug synergy is maintained by this model at all times (shown here as unbroken, smooth lines at 12h and 36h). The observed population densities are also shown (with standard error bars) for comparison.

this time comparing *E. coli* K12 (AG100) [22] with *E. coli* K12 (AG100A)( $\Delta acr$ ) [28], where the latter is derived from the former by deletion of the *acrAB* operon. Otherwise, media and drugs were exactly as found in the previous serial dilution experiment described above, Ex. 2.

The same controls were also used. Calibration experiments (see Ex. 1) and the serial dilution experiment itself were inoculated with cultures prepared from the same colony on an agar plate, respectively. Deviating from Ex. 2, we now implemented five experimental concentration combinations for each of the two strains, these were:

$$\left(\frac{0}{4}D_{50} + \frac{4}{4}E_{50}, \frac{1}{4}D_{50} + \frac{3}{4}E_{50}, \frac{2}{4}D_{50} + \frac{2}{4}E_{50}, \frac{3}{4}D_{50} + \frac{1}{4}E_{50}, \frac{4}{4}D_{50} + \frac{0}{4}E_{50}\right).$$

For both strains and both drugs,  $IC_{50}$  values were calibrated as the concentrations giving 50%  $OD_{600nm}$  inhibition measured at 24h (see Table S2).

|        | $E_{50}$ in $\mu g/ml$ | $D_{50}$ in $\mu g/ml$ |
|--------|------------------------|------------------------|
| AG100  | 7                      | 0.16                   |
| AG100A | 0.33                   | 0.037                  |

**Table S2** –  $IC_{50}$  values determined for *E. coli* K12 strains AG100 and AG100A( $\Delta acr$ ).

For this serial dilution experiment, each treatment (including controls) was replicated 6 times and the transfers were implemented for three days using one 96 well plate per day (we combined both strains into one run on a single plate). Optical density ( $OD_{600nm}$ ) was measured every 7.5 minutes, with a FLUOstar Omega plate reader controlling the temperature at  $30^{\circ}C$  and shaking the plate linearly at 300 rpm between measurements.

An additional microtiter plate was refrigerated alongside the other plates used throughout the duration of the serial dilution experiment. This was assayed with an inoculation culture from the original agar plate colony after the serial dilution experiment had finished to control for degradation of the drugs. No difference in growth between the first day of the experiment and the control experiment was found, we conclude that the drugs in the growth medium had not degraded during this part of the experiment.

**7.2. Outcome: synergy is maintained for longer with the pump knockout.** The results of this experiment are summarised in supplement fig. S17 and supplement fig. S18. These figures are completely consistent with what was anticipated from the predictions of the mathematical analysis: in the presence of the *acrAB-tolC* efflux system, the smile-frown transition is seen in strain AG100 but the AG100A( $\Delta acr$ ) it is lost. In particular, supplement fig. S18 shows that the loss of the *acrAB-tolC* pump ensures that erythromycin and doxycycline are still synergistic for the pump knockout strain AG100A( $\Delta acr$ ) even by day three of the protocol.

Supplement fig. S19 shows that synergy is lost by day four because the densities are now maximal in one of the combination treatments. However, the  $\alpha$ -test does not show significant antagonism and so we cannot

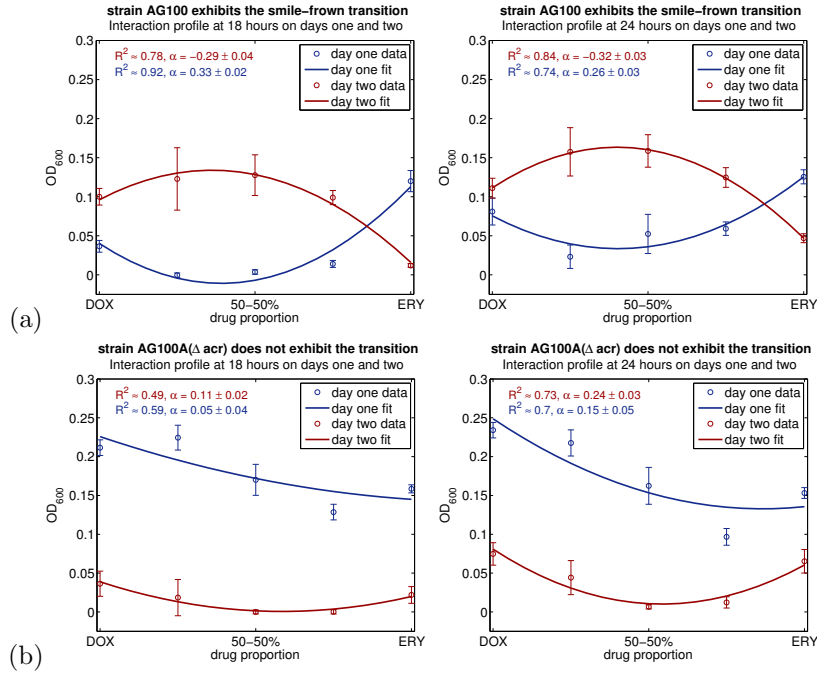

**supplement fig. S17** – A repetition of the test for synergy applied in supplement figs. S8 based on a quadratic fit (and a t-test) to density data as a function of  $\theta$ . Here (a) shows that strain AG100 undergoes the smile-frown transition using experimental protocol Ex. 2, reporting synergy on day one (red line quadratic fit, red circles data; t-test at 18h,  $df = 27, t \approx 14.84, p < 10^{-13}$ ) and antagonism on day two (blue line quadratic fit, blue points data; t-test at 18h  $df = 27, t \approx -7.45, p < 10^{-7}$ ). The data in (b) shows that the same experimental protocol provides no evidence for a change in drug interaction over 48h when the strain AG100A( $\Delta acr$ ) is used: the smile-frown transition does not occur (circles are data, vertical bars are one s.e., lines are a quadratic fit).

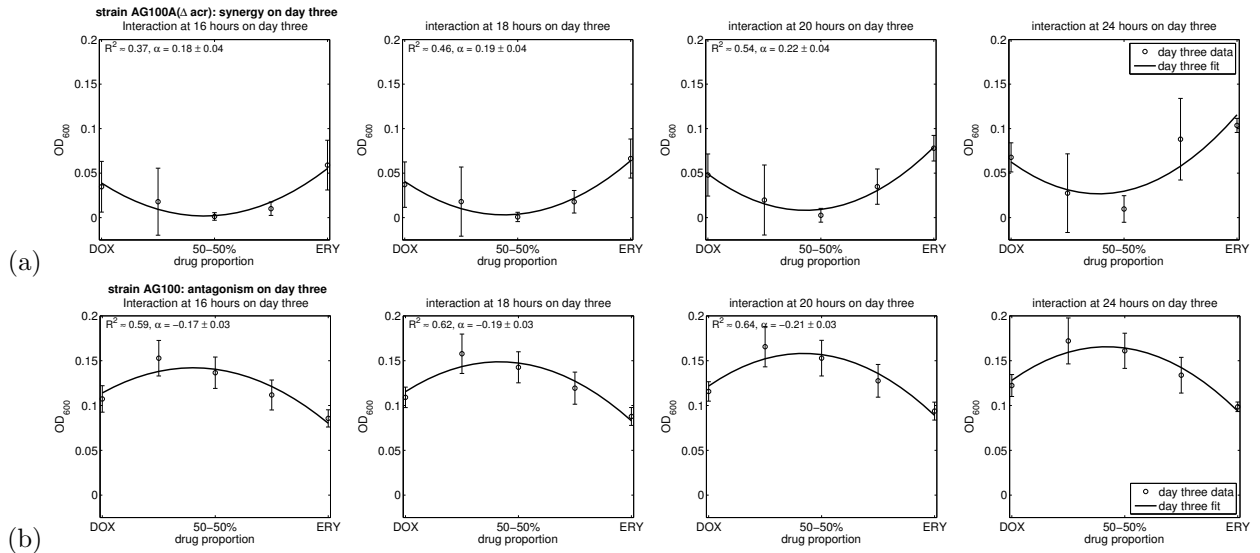

**supplement fig. S18** – (a) The analogous experimental protocol and data to supplement fig. S17 for strain AG100A( $\Delta acr$ ) and now extended to day three. All four figures taken at four different times on this day are consistent with synergy ( $p < \{0.0003, 10^{-4}, 10^{-5}, 10^{-6}, 0.0006\}$  for each figure separately ( $\alpha$  in figure legend,  $df = 27, t \approx \{4.17, 4.74, 5.45, 4.89\}$ )) with no evidence of antagonism by the end of day three (rightmost figure). (b) The analogous figure to (a) above, but for the wild-type AG100 strain: antagonism is maintained on day three ( $p < \{10^{-5}, 10^{-5}, 10^{-6}, 10^{-6}\}$  for each figure separately with  $df = 27, t \approx \{-5.5, -6.12, -6.38, -6.38\}$ ).

claim that the smile-frown transition has occurred for this knockout strain, even though one of the combination therapies has now lead to the highest population density of all the treatments trialled.

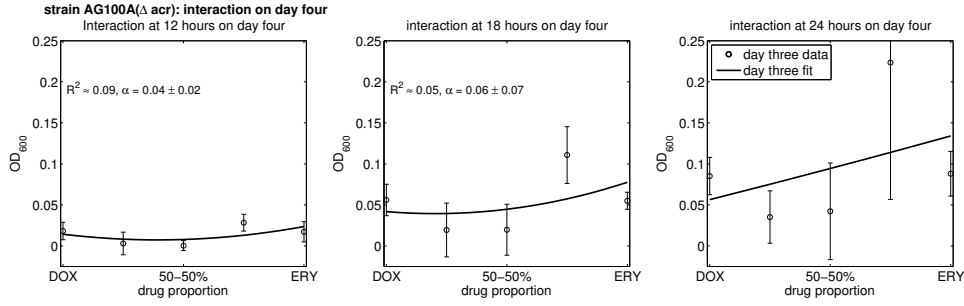

**supplement fig. S19** – The  $\alpha$ -test applied to day four data shows no statistically significant evidence of a synergistic or antagonistic interaction. However, the density of the population is maximised for a combination treatment, as can be seen in the middle pane at 18h.

**7.3. Dose-dependence: higher doses amplify the smile-frown transition.** In order to understand whether the smile-frown transition might be lost at different dosages or different strengths of synergy, we altered the model in equation (4) by redefining the interaction function  $a(\theta)$  to be

$$(24) \quad a(\theta) = 1 + \lambda \cdot \theta(1 - \theta).$$

This coincides with the previous definition when  $\lambda = 1$  and allows us to use  $\lambda$  as a parameter to alter the strength of synergy in this model. When we reproduce supplement fig. S1 for a ranges of  $\lambda$  values, we obtain supplement fig. S20 below. This indicates that the transition becomes more pronounced as the dose parameter  $\lambda$  increases.

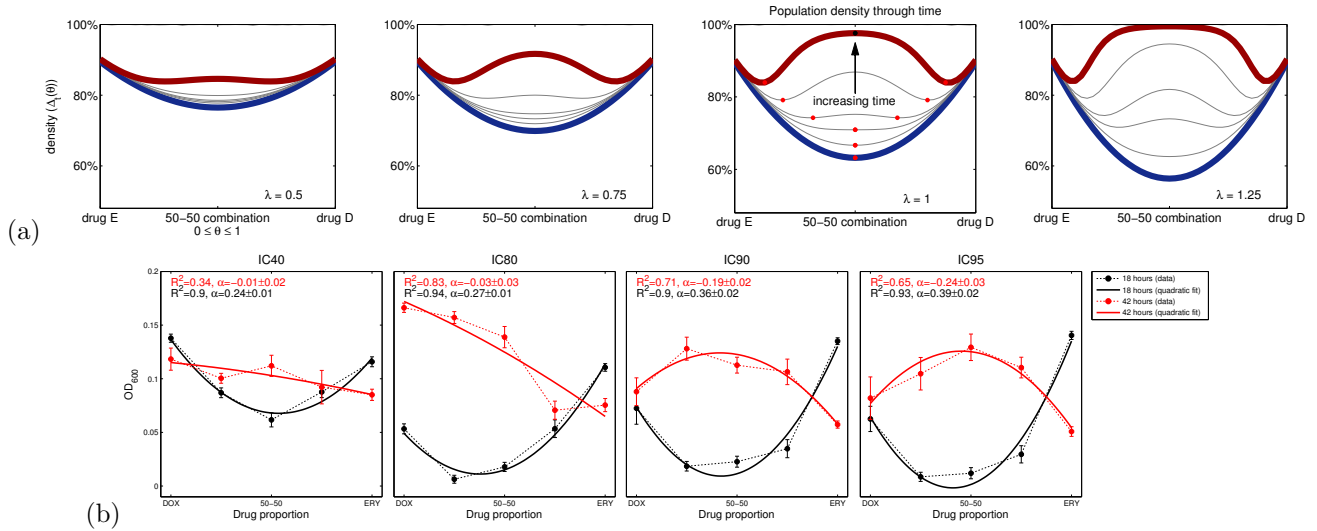

**supplement fig. S20** – (a) When four different values of  $\lambda$  are used in the definition of  $a$  in (24) and this is implemented in the model defined by (4), the resulting computation indicates that larger values of this parameter produce a more pronounced smile-frown transition. (b) The analogy of this model prediction is observed in the experimental protocol executed at four dosages of increasingly inhibitory effect: IC40, IC80, IC90 and IC95 that are defined in the text. Each of these four datasets is consistent with the loss of synergy before the end of the second day of treatment.

In order to test this prediction we executed the evolutionary protocol at four different dosages using strain AG100, dosages that reduced growth relative to a zero-drug control by 40%, 80%, 90% and 95% (when measured at 18h on day one). As supplement fig. S21 shows, a correlation between dose, the strength of synergy and the strength of later antagonism can be seen in the empirical dataset. Indeed, when we plot the day one and

day two empirical drug interactions supplement fig. S21 shows a strongly negative correlation between the two. Moreover, supplement fig. S22 shows, in addition, that the smile-frown transition occurs earlier in the treatment as the dose is increased.

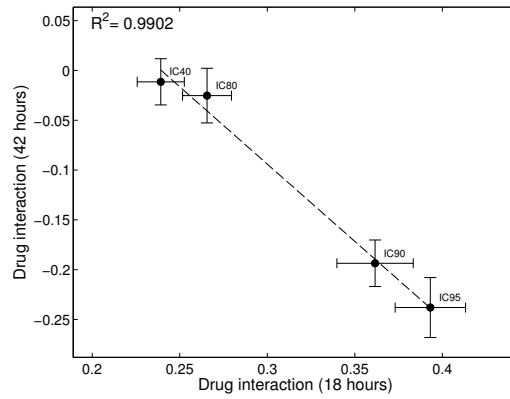

**supplement fig. S21** – The experimental protocol executed at four dosages of increasingly inhibitory effect, IC40, IC80, IC90 and IC95, shows that the drug interaction on day one (18h) is negatively correlated with the interaction on day two (42h).

X

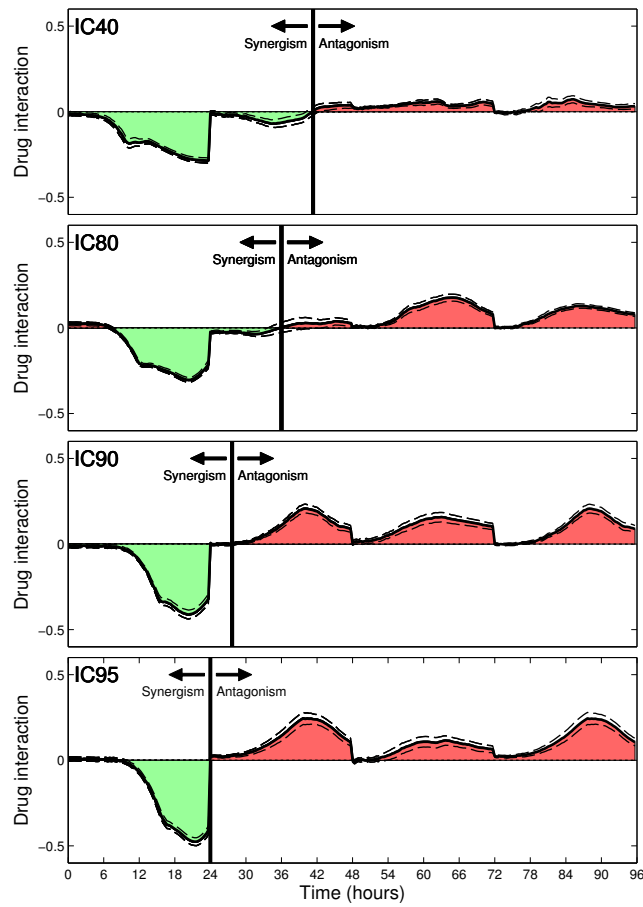

**supplement fig. S22** – The value of  $-\alpha$  from the  $\alpha$ -test is shown on the y-axis (with s.e. plotted as dashed lines) and this indicates that the smile-frown transition occurs earlier as the antibiotic dose is increased.



**7.4. Colony forming units (CFUs) as a density measure.** In order to verify that optical density (at 600nm) also measures live cell densities we verified the existence of a linear correlation between  $OD_{600nm}$  and population density measured in CFUs. The resulting data is shown in supplement fig. S23(a) where the correlation is evident. As a result, when we sought to test the existence of a smile-frown transition in density units of CFUs, this was also observed within a period of two days, as can be seen in supplement fig. S23(b) which shows density in CFUs measured at 18h on day one and 42h on day two. The drug concentration was chosen so that a 50-50 combination therapy would achieve 95% growth inhibition when measured at 18h relative to a no-drug control culture.

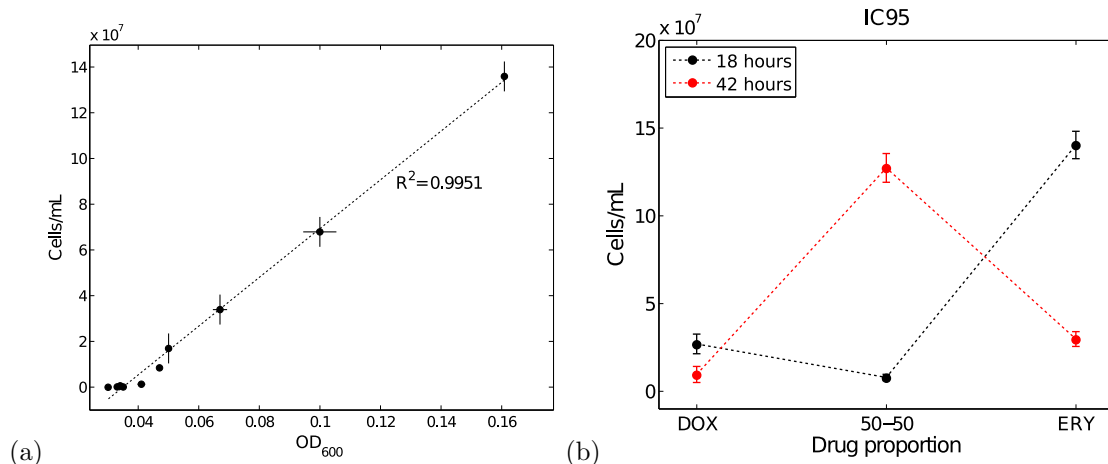

**supplement fig. S23** – (a) Optical density (x-axis) is linearly correlated with population density as measured by colony forming units (‘Cells/mL’ on the y-axis). (b) As a result, we observe the existence of the smile-frown transition when measuring population densities in units of CFUs, here for three drug proportion parameters,  $\theta = 0, 1/2$  and 1. In both cases we used basal drug concentrations so that 95% inhibition was achieved for the 50-50 combination treatment.

## 8. OPTIMAL DRUG COMBINATIONS ARE NOT CONSTANT: AN ANALYSIS

Motivated by the result that both observed data and different mathematical models of drug deployment exhibit a change in optimal drug combination over time, we now seek mathematical results to understand the generality of this phenomenon. So, consider the following abstraction of a very large class of antibiotic-deployment models:

$$(25) \quad \frac{d}{dt} \mathbf{x} = T \cdot \mathcal{F}(\mathbf{x}, D, E)$$

where  $\mathbf{x}(t)$ , for  $0 \leq t \leq 1$ , is the state of the system encoding all the dynamical variables needed to describe the dynamics of the system (we shall assume there is a finite number of such variables, call it  $n$  and so  $\mathbf{x} \in \mathbb{R}^n$ ). This can be seen as a re-definition of equation (22a) but whereby the variable  $T$  that defines the length of each season in the experiment has been made explicit in (25) through a re-scaling of the time variable in (22a). We have also made basal concentrations of antibiotic explicit,  $D$  and  $E$ , for convenience below. Equation (25) is too general a mathematical problem with which to study drug combinations without imposing further structure, so we do that now.

The function  $\mathcal{F}$  is assumed to be infinitely differentiable and we shall assume that there is a constant  $C(D, E)$  such that

$$(26) \quad \limsup_{T \rightarrow \infty} \sup_{0 \leq t \leq 1} \|\mathbf{x}(t)\| \leq C(D, E),$$

where  $\|\cdot\|$  denotes any finite-dimensional norm. Equation (26) is a dissipative condition that is commonly satisfied by physical systems for which a law of conservation of energy or biomass can be formulated. This bound states that solutions of (25) are eventually attracted to some ball that is independent of initial conditions but which may depend on other systemic parameters.

Suppose  $D$  is a constant that represents the extracellular input concentration of drug ‘D’ to the system and  $E$  is the analogous quantity for the other drug. Let us suppose without the loss of any generality that maximal concentrations of both drugs have been normalised to achieve equal effect, so that  $0 \leq D \leq 1$  and  $0 \leq E \leq 1$  and unity here represents the numerical value of that concentration.

As we have done throughout this manuscript, the general model class represented by equation (25) assumes that there are three dynamical systems that represent multiple drug use:  $\frac{d}{dt}\mathbf{x} = T \cdot \mathcal{F}(\mathbf{x}, 0, 0)$  in the complete absence of drug use  $\frac{d}{dt}\mathbf{x} = T \cdot \mathcal{F}(\mathbf{x}, D_0, 0)$  arises when we use  $D$  only and at concentration  $D_0$ , and  $\frac{d}{dt}\mathbf{x} = T \cdot \mathcal{F}(\mathbf{x}, 0, E_0)$  is the analogous system but for drug ‘E’. Given this formulation, we can now simulate the use of a fixed combination of both drugs with the equation

$$(27) \quad \frac{d}{dt}\mathbf{x} = T \cdot \mathcal{F}(\mathbf{x}, \theta D_0, (1 - \theta)E_0).$$

The optimal drug combination is found by observing  $\mathbf{x}(\cdot)$  over some period of time,  $T$ , and determining the drug combination that minimises this observation. Thus, we use the dimensionless parameter  $\theta \in [0, 1]$  to represent the relative drug fraction and define the *drug interaction profile* at time  $T$ :

$$(28a) \quad J(T, \theta) = \int_0^1 (\mathbf{w}, \mathbf{x}(t; \theta, T)) dt$$

where

$$(28b) \quad \frac{d}{dt}\mathbf{x} = T \cdot \mathcal{F}(\mathbf{x}, \theta D_0, (1 - \theta)E_0) \quad \text{and} \quad \mathbf{x}(0) = \mathbf{x}_0.$$

We now seek the *optimal drug combination*, this is the number  $\theta_{\text{opt}}(T)$  that satisfies

$$(28c) \quad J(T, \theta_{\text{opt}}(T)) = \min\{J(T, \theta) : 0 \leq \theta \leq 1\}.$$

The vector  $\mathbf{w}$  that appears in the definition of  $J$  above is a weight vector whose entries sum to unity that attributes different weights to the components of  $\mathbf{x}$ .

The following restriction is not, in fact, used anywhere in the analysis below, but the idea that  $E$  and  $D$  represent growth-reducing drugs could be expressed, for example, by the abstract conditions that

$$\left( \mathbf{w}, \frac{\partial}{\partial D} \mathcal{F}(\mathbf{x}, D, E) \right) \leq 0 \quad \text{and} \quad \left( \mathbf{w}, \frac{\partial}{\partial E} \mathcal{F}(\mathbf{x}, D, E) \right) \leq 0$$

whenever  $E \geq 0$  and  $D \geq 0$ . This pair of conditions means that growth rate is reduced in the components of  $\mathbf{w}$  that contribute to the optimality condition whenever drug is increased in concentration.

**8.1. Mathematical definition of synergy.** Given this formulation, we now define exactly what we mean by synergy in mathematical terms.

**Definition 5** (mathematical synergy). *First define the ‘interaction function’*

$$a(\theta) = (\mathbf{w}, \mathcal{F}(\mathbf{x}_0, \theta D_0, (1 - \theta)E_0))$$

and then to ensure the basal drug concentrations,  $D_0$  and  $E_0$ , are calibrated to have equal inhibitory effect, we assume that  $a(0) = a(1)$ . Strict drug synergy is said to hold in (27) when  $a$  is **convex**:  $a''(\theta) > 0$  for all  $\theta \in (0, 1)$ .

We define the most synergistic combination,  $\theta_{\text{syn}} \in (0, 1)$ , to be the value of  $\theta$  for which the minimum of  $a(\theta)$  occurs.

For completeness, we include the following definition.

**Definition 6** (mathematical antagonism). *Suppose that the basal drug concentrations  $D_0$  and  $E_0$  are calibrated to equal inhibitory effect:  $a(0) = a(1)$ . Strict drug antagonism is then said to hold in (27) when the function  $a(\theta)$  is **concave**:  $a''(\theta) < 0$  for all  $\theta \in (0, 1)$ .*

**8.2. Generically, the optimal combination changes through time.** We now assume that the drugs are ‘mathematically distinct’, in the sense for example of having different modes of action or having different binding pockets on the same protein target. This allows us to quite reasonably impose inequalities on the structure of  $\mathcal{F}$  that will hold in a generic sense. For instance, let us define the following, somewhat obscure, function whose meaning will become clear below,

$$(29) \quad b(\theta) = (\mathbf{w}, d_{\mathbf{x}}\mathcal{F}(\mathbf{x}_0, \theta D_0, (1 - \theta)E_0)[\mathcal{F}(\mathbf{x}_0, \theta D_0, (1 - \theta)E_0)]).$$

and assume the non-degeneracy condition that  $b(\theta_{\text{syn}}) \neq 0$ . The physical interpretation of this condition is not obvious, but it is the mathematical nature of this condition that allows us to prove that  $\theta_{\text{opt}}(T)$  is not constant in  $T$ , even for very small  $T$ , as follows.

**Theorem 1.** *Assuming strict drug synergy is satisfied in (27) and that condition (29) holds, then there is a Taylor expansion*

$$\theta_{\text{opt}}(T) = \theta_{\text{syn}} - \overbrace{\left( \frac{b'(\theta_{\text{syn}})}{6a''(\theta_{\text{syn}})} \right)}^{\text{divergence rate: } \rho} T + O(T^2).$$

Therefore  $\theta_{\text{opt}}(T)$  is approximately equal to optimal synergy for small  $T$ , but is not a constant function of  $T$  in general and the rate of divergence of these two quantities depends on the convexity of the interaction function,  $a(\theta)$ .

*Proof.* (sketch) As a result of (26), for each  $T > 0$ , the interval of existence of solutions of the differential equation (25) can be extended to the interval  $[0, 1]$ . Hence, (27) can be written as the zeros of a well-defined and smooth mapping,  $\mathcal{G}(\mathbf{x}; \theta, T) = 0$ , where  $\mathcal{F} : C_0^1 \times [0, 1] \times [0, \infty) \rightarrow C^0$ . Here,  $C_0^1$  is the space of continuously differentiable functions,  $\mathbf{x}(t)$ , defined on the closed unit interval  $[0, 1]$  taking values in  $\mathbb{R}^n$  such that  $\mathbf{x}(0) = \mathbf{x}_0$  where  $C^0$  is the analogous space of continuous functions; both spaces are assumed to be supplied with appropriate  $C^1$  and  $C^0$  norms to make them Banach spaces. Explicitly, the nonlinear mapping  $\mathcal{G}$  is given by

$$\mathcal{G}(\mathbf{x}; \theta, T) = -\frac{d}{dt}\mathbf{x} + T \cdot \mathcal{F}(\mathbf{x}, \theta D_0, (1 - \theta)E_0).$$

We can trivially solve equation  $\mathcal{G}(\mathbf{x}; \theta, T) = 0$  by setting  $T = 0$  because  $\mathcal{G}(\mathbf{x}_0; \theta, 0) \equiv 0$  where  $\mathbf{x}_0 \in C_0^1$  is the constant function and  $\theta \in [0, 1]$  is arbitrary. Now note that the partial  $\mathbf{x}$ -derivative of  $\mathcal{G}$  satisfies  $d_{\mathbf{x}}\mathcal{G}(\mathbf{x}_0; \theta, 0) = \frac{d}{dt}$ . As the differential operator  $\frac{d}{dt}$  is a bounded linear isomorphism from  $C_0^1$  to  $C^0$ , we can apply the implicit function theorem (see [33] for a formulation appropriate to our needs) to locally solve  $\mathcal{G}(\mathbf{x}; \theta, T) = 0$  for  $\mathbf{x}$  as a function of  $(\theta, T)$ . Using (26) and the compactness of the interval  $[0, 1]$ , the resulting function  $\mathbf{x}(\theta, T)$  can be extended smoothly using the implicit function theorem so that its domain encompasses all values of  $\theta$  from 0 to 1,  $[0, 1] \times [0, T_0]$  say for some  $T_0 > 0$ . Being a smooth function, the resulting function may then be expanded in powers of  $T$  as  $\mathcal{F}$  was assumed to be infinitely differentiable. Hence,

$$\mathbf{x}(t; \theta, T) = X_0(t; \theta) + T \cdot X_1(t; \theta) + T^2 \cdot X_2(t; \theta) + O(T^3),$$

where the dependence of the expansion on the variable  $\theta$  will be suppressed in the following for brevity.

From equation (25),

$$\frac{d}{dt}X_0 + T \frac{d}{dt}X_1 + T^2 \frac{d}{dt}X_2 + O(T^3) = T \cdot \mathcal{F}(X_0 + TX_1 + T^2X_2 + O(T^3), \theta D_0, (1 - \theta)E_0)$$

and we can also expand the latter in powers of  $T$ . Comparing powers of  $T$  in this expansion gives:

$$O(T^0): \frac{d}{dt}X_0 = 0, X_0(0) = \mathbf{x}_0,$$

$$O(T^1): \frac{d}{dt}X_1 = \mathcal{F}(\mathbf{x}_0, \theta D_0, (1 - \theta)E_0), X_1(0) = 0 \text{ and}$$

$$O(T^2): \frac{d}{dt}X_2 = \mathcal{F}_{\mathbf{x}}(\mathbf{x}_0, \theta D_0, (1 - \theta)E_0)[X_1(t)], X_2(0) = 0$$

whence

$$\mathbf{x}(t; \theta, T) = \mathbf{x}_0 + tT \cdot \mathcal{F}_0(\theta) + \frac{t^2 T^2}{4} C_0(\theta)[\mathcal{F}_0(\theta)] + O(T^3)$$

where  $\mathcal{F}_0(\theta) = \mathcal{F}(\mathbf{x}_0, \theta D_0, (1 - \theta)E_0)$  and  $C_0(\theta) = \mathcal{F}_{\mathbf{x}}(\mathbf{x}_0, \theta D_0, (1 - \theta)E_0)$ . As a result,

$$\begin{aligned}
J(\theta, T) &= \int_0^1 \left( \mathbf{w}, \mathbf{x}_0 + tT \cdot \mathcal{F}_0 + \frac{t^2 T^2}{4} C_0[\mathcal{F}_0] + O(T^3) \right) dt \\
&= (\mathbf{w}, \mathbf{x}_0) + \frac{T}{2} (\mathbf{w}, \mathcal{F}_0(\theta)) + \frac{T^2}{12} (\mathbf{w}, C_0(\theta)[\mathcal{F}_0(\theta)]) + O(T^3) \\
&= (\mathbf{w}, \mathbf{x}_0) + \frac{T}{2} a(\theta) + \frac{T^2}{12} b(\theta) + O(T^3) \\
(30) \quad &= (\mathbf{w}, \mathbf{x}_0) + \frac{T}{2} \left( a(\theta) + \frac{T}{6} b(\theta) + O(T^2) \right).
\end{aligned}$$

We define  $j(\theta, T) = a(\theta) + \frac{T}{6} b(\theta) + O(T^2)$  so that  $J(\theta, T) = (\mathbf{w}, \mathbf{x}_0) + \frac{T}{2} j(\theta, T)$ .

From the strict drug synergy property, the minimum of  $j(\theta, 0)$  occurs when  $\theta = \theta_{\text{syn}} \in (0, 1)$ . Moreover, at the minimum of  $j$ , there results  $\frac{\partial j}{\partial \theta}(\theta, T) = 0$ , provided  $T$  is small enough. Since  $\frac{\partial^2 j}{\partial \theta^2}(\theta_{\text{syn}}, 0) = a''(\theta_{\text{syn}}) < 0$  which is a non-zero quantity by the assumption of strict drug synergy, we may solve  $\frac{\partial j}{\partial \theta}(\theta, T) = 0$  for  $\theta$  as a function of  $T$  by applying the implicit function theorem. At this solution  $\theta = \theta_{\text{opt}}(T)$ , say, and it follows by definition that  $\theta_{\text{opt}}(0) = \theta_{\text{syn}}$ . Hence, because  $\frac{\partial j}{\partial \theta}(\theta_{\text{opt}}(T), T) \equiv 0$ ,

$$a'(\theta_{\text{opt}}(T)) + \frac{T}{6} b'(\theta_{\text{opt}}(T)) + O(T^2) \equiv 0$$

and, differentiating with respect to  $T$ , we establish

$$(\theta_{\text{opt}})'(T) \left( a''(\theta_{\text{opt}}(T)) + \frac{T}{6} b''(\theta_{\text{opt}}(T)) \right) + b'(\theta_{\text{opt}}(T))/6 + O(T) \equiv 0.$$

The result follows on setting  $T = 0$  and expanding  $\theta_{\text{opt}}(T)$  as a power series because  $(\theta_{\text{opt}})'(0) a''(\theta_{\text{syn}}) + b'(\theta_{\text{syn}})/6 = 0$ .  $\square$

**Remark 3.** *We end with the following observations.*

- (1) *The expansion of the drug interaction profile,  $J(\theta, T)$ , in (30) might be described as having the structure*

$$\underbrace{(\mathbf{w}, \mathbf{x}_0)}_{\text{initial population size}} + \underbrace{T a(\theta)}_{\text{short-term synergy}} + \underbrace{T^2 b(\theta)}_{\text{fastest adaptation}} + \underbrace{O(T^3)}_{\text{slower adaptation}}.$$

- (2) *Do note that while this analysis is sufficient to show that optimal combinations based on short-term synergy are not likely to be stable to changes in population structure, the argument does not show that synergy is necessarily lost and replaced with an antagonistic drug interaction profile. Whether or not the smile-frown transition occurs is a system-specific property in the sense that it depends on the nature of  $b(\theta)$ , in particular whether or not it is a concave function, and how large  $T$  becomes over the course of the experiment.*
- (3) *Note that the rate of divergence between synergy and the optimal therapy,  $\rho$ , in the statement of Theorem 1 depends explicitly on the drug synergy measure  $a''(\theta)$ .*

## 9. FINAL COMMENT: SINGLE CELL SYNERGY AND POPULATION SYNERGY

It is stated in [34] that studies of drug interactions do not account for population heterogeneities:

*‘Much of drug interaction theory ... rests upon the assumption that the drug combination is acting upon a single, antibiotic-susceptible population of cells.’*

The present study indicates clear reasons why the study of growth inhibition of homogeneous populations of bacteria has the potential to provide misleading information in terms of how drugs interact for treatments of prolonged durations, meaning more than one day.

To be more precise, consider the growth inhibition function  $G(S, D, E)$  in the model defined by equation (23). We have assumed that the interaction function

$$i(\theta) = G(S, \theta D_0, (1 - \theta)E_0)$$

takes its minimum at a value of  $\theta$  strictly between 0 and 1 for all possible dosages  $D_0$  and  $E_0$ , thus representing synergy. Now, as a result, one could argue that any population of cells for which the growth rate of every subpopulation is described by a function of this synergistic form must also exhibit synergy when measuring

population densities, after all the growth rate reduction for each cell exhibits synergy. This seems almost obvious.

However, the results of this paper demonstrate that it is wrong to make this inference. The reason for this, at least in our modelling framework, is the nonlinearity of the system that results from accounting for the loss of essential metabolites, like carbon, from the environment as the cells grow. Only if carbon is not limiting,  $S = \infty$  say, can this inference work. If it is limiting, our work shows this intuition can fail.

## REFERENCES

- [1] Loewe S (1953) The problem of synergism and antagonism of combined drugs. *Arzneimittelforschung* 3: 285–290.
- [2] Greco WR, Bravo G, Parsons JC (1995) The search for synergy: a critical review from a response surface perspective. *Pharmacol Rev* 47: 331–385.
- [3] Cokol M, Chua HN, Tasan M, Mutlu B, Weinstein ZB, et al. (2011) Systematic exploration of synergistic drug pairs. *Mol Syst Biol* 7: 544.
- [4] Ehrlich P (1913) Address in pathology on chemotherapeutics. *The Lancet* : 445–451.
- [5] Hegreness M, Shores N, Damian D, Hartl D, Kishony R (2008) Accelerated evolution of resistance in multidrug environments. *PNAS* 105: 13977–13981.
- [6] Bentley DR, Balasubramanian S, Swerdlow HP, Smith GP, Milton J, et al. (2008) Accurate whole human genome sequencing using reversible terminator chemistry. *Nature* 456: 53–59.
- [7] Kelley DR, Schatz MC, Salzberg SL (2010) Quake: quality-aware detection and correction of sequencing errors. *Genome Biol* 11: R116.
- [8] Cox MP, Peterson DA, Biggs PJ (2010) Solexaqa: At-a-glance quality assessment of illumina second-generation sequencing data. *BMC Bioinformatics* 11: 485.
- [9] Ferenci T, Zhou Z, Betteridge T, Ren Y, Liu Y, et al. (2009) Genomic sequencing reveals regulatory mutations and recombinational events in the widely used MC4100 lineage of *Escherichia coli* K-12. *J Bacteriol* 191: 4025–4029.
- [10] Li H, Durbin R (2009) Fast and accurate short read alignment with Burrows-Wheeler transform. *Bioinformatics* 24: 1754–1760.
- [11] Wu TD, Nacu S (2010) Fast and snp-tolerant detection of complex variants and splicing in short reads. *Bioinformatics* 26: 873–881.
- [12] Li H, Handsaker B, Wysoker A, Fennell T, Ruan J, et al. (2009) The sequence alignment/map format and samtools. *Bioinformatics* 25: 2078–2079.
- [13] Quinlan A, Hall I (2010) Bedtools: A flexible framework for comparing genomic features. *Bioinformatics* 26.
- [14] Wei Z, Wang W, Hu P, Lyon G, Hakonarson H (2011) Snver: a statistical tools for variant calling in analysis of pooled or individual next-generation sequencing data. *Nucleic Acids research* : 1–13.
- [15] Koboldt D, Zhang Q, Larson D, Shen D, McLellan M, et al. (2012) VarScan 2: Somatic mutation and copy number alteration discovery in cancer by exome sequencing. *Genome Research* 22: 568–576.
- [16] Chen K, Wallis J, McLellan M, Larson D, Kalicki J, et al. (2009) Breakdancer: an algorithm for high-resolution mapping of genomic structural variation. *nature Methods* 6: 677–684.
- [17] Abyzov A, Urban AE, Snyder M, Gerstein M (2011) Cnvnator: An approach to discover, genotype, and characterize typical and atypical cnvs from family and population genomic sequencing. *Genome Research* 21: 974–984.
- [18] Ye K, Schulz M, Long Q, Apweiler R, Ning Z (2009) Pindel: a pattern growth approach to detect break points of large deletions and medium sized insertions from paired-end short reads. *Bioinformatics* 25: 2865–2871.
- [19] Cohen S, Haechler H, Levy S (1993) Resistance (mar) locus in *Escherichia coli*. *Journal of bacteriology* 175: 1484–1492.
- [20] Ma D, MAlberti, Lynch C, Nikaido H, Hearst JE (1996) The local repressor AcrR plays a modulating role in the regulation of acrAB genes of *Escherichia coli* by global stress signals. *Molecular microbiology* 19: 101–112.
- [21] Randall L, Woodward M (2002) The multiple antibiotic resistance (mar) locus and its significance. *Research in Veterinary Science* 72: 87–93.
- [22] George AM, Levy SB (1983) Amplifiable resistance to tetracycline, chloramphenicol, and other antibiotics in *Escherichia coli*: involvement of a non-plasmid-determined efflux of tetracycline. *J Bacteriol* 155: 531–540.
- [23] Martin R, Rosner J (2004) Transcriptional and translational regulation of the marRAB multiple antibiotic resistance operon in *Escherichia coli*. *Molecular Microbiology* 53: 183–191.
- [24] Barbosa T, Levy S (2000) Differential expression of over 60 chromosomal genes in *Escherichia coli* by constitutive expression of MarA. *Journal of bacteriology* 182: 3467–3474.
- [25] Pomposiello P, Bennik M, Demple B (2001) Genome-wide transcriptional profiling of the *Escherichia coli* responses to superoxide stress and sodium salicylate. *Journal of Bacteriology* 183: 3890–3902.
- [26] Alekshun M, Levy S (1997) Regulation of chromosomally mediated multiple antibiotic resistance: the mar regulon. *Antimicrobial agents and chemotherapy* 41: 2067–2075.
- [27] Ma D, Cook D, MAlberti, NGPon, Nikaido H, et al. (1995) Genes acrA and acrB encode a stress-induced efflux system of *Escherichia coli*. *Molecular microbiology* 16: 45–55.
- [28] Okusu H, Ma D, Nikaido H (1996) AcrAB efflux pump plays a major role in the antibiotic resistance phenotype of *Escherichia coli* multiple-antibiotic-resistance (Mar) mutants. *J Bacteriol* 178: 306–308.
- [29] McMurry L, Oethinger M, Levy S (1998) Overexpression of marA, sod, or acrAB produces resistance to triclosan in laboratory and clinical strains of *Escherichia coli*. *FEMS Microbiology Letters* 166: 305–309.
- [30] Mazzariol A, Tokue Y, Kanegawa T, Cornaglia G, Nakaido H (2000) High-level fluoroquinolone-resistant clinical isolates of *Escherichia coli* overproduce multidrug efflux protein AcrA. *Antimicrobial agents and chemotherapy* 44: 3441–3443.

- [31] Nicoloff H, Perreten V, McMurry LM, Levy SB (2006) Role for tandem duplication and lon protease in AcrAB-TolC-dependent multiple antibiotic resistance (Mar) in an Escherichia coli mutant without mutations in marRAB or acrRAB. *J Bacteriol* 188: 4413–4423.
- [32] Nicoloff H, Perreten V, Levy S (2007) Increased genome instability in Escherichia coli lon mutants: Relation to emergence of multiple-antibiotic-resistant (Mar) mutants caused by insertion sequence elements and large tandem genomic amplifications. *Antimicrobial Agents and Chemotherapy* 51: 1293–1303.
- [33] Ambrosetti A, Prodi G (1993) *A Primer of Nonlinear Analysis*. Cambridge University Press.
- [34] Drusano GL, Liu W, Fregeau C, Kulawy R, Louie A (2009) Differing effects of combination chemotherapy with meropenem and tobramycin on cell kill and suppression of resistance of wild-type *Pseudomonas aeruginosa* PAO1 and its isogenic MexAB efflux pump-overexpressed mutant. *Antimicrob Agents Chemother* 53: 2266–2273.

## APPENDIX A. PARAMETER VALUES

Parameter values for core inhibition model of section 6.1 are given in Table S4. Parameter values for the drug efflux model of section 6.4 are given in Table S4. Simulations were conducted in Matlab using `ode15s` or in Python using a BDF method implemented in `odeint` from the `Scipy.integrate` package.

| <i>Parameter</i> | <i>Description</i>                 | <i>Value</i>                                            |
|------------------|------------------------------------|---------------------------------------------------------|
| $S(0)$           | Glucose supply                     | 2000 $\mu\text{g}/\text{ml}$                            |
| $D(0)$           | Basal concentration of drug $D$    | 0.15 $\mu\text{g}/\text{ml}$                            |
| $E(0)$           | Basal concentration of drug $E$    | 9 $\mu\text{g}/\text{ml}$                               |
| $V_{\max}$       | Maximal uptake rate                | $2.6 \times 10^{-6}$ $\mu\text{g}/\text{cell}/\text{h}$ |
| $K$              | Bacterial half-saturation constant | 0.0527 $\mu\text{g}/\text{ml}$                          |
| $c$              | Resource conversion                | $1.851 \times 10^4$ cell/ $\mu\text{g}$                 |
| $d$              | Drug $D$ binding rate              | $1.469 \times 10^{-9}$ $\mu\text{g}/\text{cell}$        |
| $e$              | Drug $E$ binding rate              | $1.44 \times 10^{-9}$ $\mu\text{g}/\text{cell}$         |
| $\eta$           | Dilution parameter                 | $\sim 1\%$ of volume                                    |

**Table S3** – Parameter values used for the simulations of the model presented in section 6.1.

| <i>Parameter</i>               | <i>Description</i>                     | <i>Value</i>                                                                                                  |
|--------------------------------|----------------------------------------|---------------------------------------------------------------------------------------------------------------|
| $S_0$                          | Glucose supply                         | 2000 $\mu\text{g}/\text{ml}$                                                                                  |
| $D_0$                          | Basal concentration of drug $D$        | 0.15 $\mu\text{g}/\text{ml}$                                                                                  |
| $E_0$                          | Basal concentration of drug $E$        | 9 $\mu\text{g}/\text{ml}$                                                                                     |
| $V_{\max}$                     | Maximal uptake rate                    | 1139.6 $\mu\text{g}/\text{OD}_{600\text{nm}}/\text{h}$                                                        |
| $K$                            | Bacterial half-saturation constant     | 0.53882 $\mu\text{g}/\text{ml}$                                                                               |
| $c$                            | Resource conversion                    | 0.000315 $\text{OD}_{600\text{nm}}/\mu\text{g}$                                                               |
| $\kappa_e, \kappa_d, \kappa_m$ | Drug inhibition parameters             | 0.2 $\text{ml}/\mu\text{g}$ , 300 $\text{ml}/\mu\text{g}$ , 4000 $[\text{ml}/\mu\text{g}]^2$                  |
| $v_e, k_e$                     | Efflux parameters for drug $E$         | 3987.3 $\text{ml}/\text{OD}_{600\text{nm}}/\text{h}$ , 19.681 (dimensionless)                                 |
| $v_d, k_d$                     | Efflux parameters for drug $D$         | 3999.1 $\text{ml}/\text{OD}_{600\text{nm}}/\text{h}$ , 0.8 (dimensionless)                                    |
| $\varphi_e, \varphi_d$         | Diffusion equilibration                | 93.068 $\text{ml}/\text{OD}_{600\text{nm}}/\text{h}$ , 0.041346 $\text{ml}/\text{OD}_{600\text{nm}}/\text{h}$ |
| $\delta, \Delta$               | Gene copy rate, pump decay coefficient | 0.0025 per gene/ $\text{h}$ , 18 (dimensionless)                                                              |
| $g$                            | pump gene transcription coefficient    | 0.5 (dimensionless)                                                                                           |
| $d_D, d_E$                     | drug decay parameters                  | in the interval $[\frac{1}{24} \ln(0.8), 0]$ per day                                                          |
| $10^7$ cells/ml (CFUs/ml)      | cell density measure                   | 0.13 ( $\pm 0.02$ ) $\text{OD}_{600\text{nm}}$                                                                |

**Table S4** – Model parameters used in the numerical simulations discussed in section 6.4

APPENDIX B. GENES ANNOTATED IN THE DUPLICATED REGION

| start_position                                 | end_position | gene | annotation                                                                                                                                                                                                                                                                                                                                  |
|------------------------------------------------|--------------|------|---------------------------------------------------------------------------------------------------------------------------------------------------------------------------------------------------------------------------------------------------------------------------------------------------------------------------------------------|
| <b>Antibiotic binding and resistance genes</b> |              |      |                                                                                                                                                                                                                                                                                                                                             |
| 297113                                         | 298270       | ampH | beta-lactam binding protein AmpH                                                                                                                                                                                                                                                                                                            |
| 370854                                         | 372626       | mdlA | putative multidrug transporter membrane/ATP-binding components                                                                                                                                                                                                                                                                              |
| 3383237                                        | 386386       | acrB | multidrug efflux system protein                                                                                                                                                                                                                                                                                                             |
| 360871                                         | 363225       | lon  | DNA-binding ATP-dependent protease La                                                                                                                                                                                                                                                                                                       |
| 386409                                         | 387602       | acrA | multidrug efflux system                                                                                                                                                                                                                                                                                                                     |
| 387744                                         | 388391       | acrR | regulates the acrAB operon which is involved in susceptibility to dephallothin and cephaloridineDNA-binding transcriptional repressor AcrR                                                                                                                                                                                                  |
| 72619                                          | 374400       | mdlB | putative multidrug transporter membrane/ATP-binding components                                                                                                                                                                                                                                                                              |
| 405459                                         | 406679       | fsr  | putative fosmidomycin efflux system                                                                                                                                                                                                                                                                                                         |
| 470298                                         | 470630       | emrE | member of the small MDR (multidrug resistance) family of transporters; in Escherichia coli this protein provides resistance against a number of positively charged compounds including ethidium bromide and erythromycin; proton-dependent secondary transporter which exchanges protons for compound translocationmultidrug efflux protein |
| 564735                                         | 565946       | dacA | penicillin-binding protein 5; removes C-terminal D-alanyl residues from sugar-peptide cell wall precursorsD-alanyl-D-alanine carboxypeptidase                                                                                                                                                                                               |
| 567184                                         | 568296       | mrdB | cell wall shape-determining protein                                                                                                                                                                                                                                                                                                         |
| 568299                                         | 570200       | mrDA | penicillin-binding protein 2                                                                                                                                                                                                                                                                                                                |
| <b>Transporter genes</b>                       |              |      |                                                                                                                                                                                                                                                                                                                                             |
| 22969                                          | 324342       | proY | cryptic permease that may be involved in the transport of proline across the inner membrane                                                                                                                                                                                                                                                 |
| 277442                                         | 278653       | mhpT | putative 3-hydroxyphenylpropionic transporter                                                                                                                                                                                                                                                                                               |
| 287215                                         | 288177       | tauA | with TauB and TauC responsible for taurine uptake                                                                                                                                                                                                                                                                                           |
| 288190                                         | 288957       | tauB | Part of the ABC transporter complex tauABC                                                                                                                                                                                                                                                                                                  |
| 288954                                         | 289781       | tauC | taurine transporter subunit                                                                                                                                                                                                                                                                                                                 |
| 289778                                         | 290629       | tauD | taurine metabolism                                                                                                                                                                                                                                                                                                                          |
| 298622                                         | 299842       | sbmA | involved in uptake of microcin J25                                                                                                                                                                                                                                                                                                          |
| 313280                                         | 314464       | araJ | member of the major facilitator superfamily (MFS) of transporters; unknown function; may be associated with transport or processing of arabinose polymersMFS transport protein AraJ                                                                                                                                                         |
| 329630                                         | 331477       | secD | part of the preprotein secretory system; when complexed with proteins SecF and YajC, SecDFyajC stimulates the proton motive force-driven protein translocation, and appears to be required for the release of mature proteins from the extracytoplasmic side of the membranepreprotein translocase subunit SecD                             |
| 331488                                         | 332459       | secF | forms a complex with SecD and YajC; SecDFyajC stimulates the proton motive force-driven protein translocation                                                                                                                                                                                                                               |
| 3354053                                        | 355528       | ampG | peptidoglycan recycling; member of major facilitator superfamily MFS; inner membrane protein-muropeptide transporter                                                                                                                                                                                                                        |
| 47285                                          | 348649       | yajR | putative transporter                                                                                                                                                                                                                                                                                                                        |
| 367595                                         | 369295       | ybaE | putative transporter subunit: periplasmic-binding component of ABC superfamily                                                                                                                                                                                                                                                              |
| 374949                                         | 376235       | amtB | ammonium transporter                                                                                                                                                                                                                                                                                                                        |
| 378431                                         | 378544       | ffs  | 4.5S sRNA component of Signal Recognition Particle (SRP); co-translational protein translocation into and possibly through membranes                                                                                                                                                                                                        |
| 403545                                         | 405221       | ybaL | member of the CPA-2 family of antiporters                                                                                                                                                                                                                                                                                                   |
| 410858                                         | 413362       | copA | copper exporting ATPase                                                                                                                                                                                                                                                                                                                     |
| 414559                                         | 415851       | ybaT | putative transporter                                                                                                                                                                                                                                                                                                                        |
| 417902                                         | 418579       | ybbL | putative ABC transporter ATP-binding protein YbbL                                                                                                                                                                                                                                                                                           |
| 421716                                         | 422402       | ybbA | putative ABC transporter ATP-binding protein YbbA                                                                                                                                                                                                                                                                                           |
| 495311                                         | 496753       | cusS | sensor kinase CusS                                                                                                                                                                                                                                                                                                                          |
| 496743                                         | 497426       | cusR | response regulator in two-component regulatory system with CusS                                                                                                                                                                                                                                                                             |
| 497583                                         | 498956       | cusC | with CusA, CusB and CusF is part of a cation efflux system that mediates resistance to copper and silvercopper/silver efflux system outer membrane protein CusC                                                                                                                                                                             |
| 499114                                         | 499446       | cusF | copper-binding protein                                                                                                                                                                                                                                                                                                                      |
| 499462                                         | 500685       | cusB | with CusA, CusC and CusF is part of a cation efflux system that mediates resistance to copper and silvercopper/silver efflux system membrane fusion protein CusB                                                                                                                                                                            |
| 500697                                         | 503840       | cusA | copper/silver efflux system, membrane component                                                                                                                                                                                                                                                                                             |
| 503942                                         | 505318       | pheP | phenylalanine transporter                                                                                                                                                                                                                                                                                                                   |
| 586513                                         | 587238       | gltL | glutamate and aspartate transporter subunit                                                                                                                                                                                                                                                                                                 |
| 587238                                         | 587912       | gltK | glutamate and aspartate transporter subunit                                                                                                                                                                                                                                                                                                 |
| 587912                                         | 588652       | gltJ | glutamate and aspartate transporter subunit                                                                                                                                                                                                                                                                                                 |
| 588822                                         | 589730       | gltI | glutamate and aspartate transporter subunit                                                                                                                                                                                                                                                                                                 |
| 556566                                         | 557951       | dcuC | responsible for the transport of C4-dicarboxylates during anaerobic growthC4-dicarboxylate transporter DcuC                                                                                                                                                                                                                                 |
| <b>Transposons and integrases</b>              |              |      |                                                                                                                                                                                                                                                                                                                                             |
| 273324                                         | 274340       | insH | IS5 transposase and trans-activator                                                                                                                                                                                                                                                                                                         |
| 293722                                         | 294588       | insF | IS3 element protein InsF                                                                                                                                                                                                                                                                                                                    |
| 294585                                         | 294893       | insE | IS3 element protein InsE                                                                                                                                                                                                                                                                                                                    |
| 283334                                         | 283699       | insC | IS2 OrfAB forms an overlapping reading frame with orfB to form fusion protein OrfAB due to ribosomal frameshifting                                                                                                                                                                                                                          |
| 283657                                         | 284562       | insD | IS2 OrfB                                                                                                                                                                                                                                                                                                                                    |
| 425244                                         | 429524       | rhsD | rhsD element protein                                                                                                                                                                                                                                                                                                                        |
| 466798                                         | 467961       | intD | DLP12 prophage; putative integrase                                                                                                                                                                                                                                                                                                          |
| 468816                                         | 469124       | insE | IS3 element protein InsE                                                                                                                                                                                                                                                                                                                    |
| 469121                                         | 469987       | insF | IS3 element protein InsF                                                                                                                                                                                                                                                                                                                    |
| 470885                                         | 472411       | ybcK | DLP12 prophage; putative recombinase                                                                                                                                                                                                                                                                                                        |
| 472876                                         | 473427       | ybcL | DLP12 prophage; similar to PEBP/RK1P protein family in eukaryotes that inhibits MEK phosphorylation by Raf-1; crystal structure suggests similar properties but exact function is unknown-putative kinase inhibitor                                                                                                                         |
| 473437                                         | 474234       | ybcM | DLP12 prophage; putative DNA-binding transcriptional regulator                                                                                                                                                                                                                                                                              |



|                                 |        |      |                                                                                                                                                                                                        |
|---------------------------------|--------|------|--------------------------------------------------------------------------------------------------------------------------------------------------------------------------------------------------------|
| 474449                          | 474904 | ybcN | DLP12 prophagehypothetical protein                                                                                                                                                                     |
| 474904                          | 475074 | ninE | DLP12 prophage; conserved protein similar to phage 82 and lambda proteinsphage protein NinE                                                                                                            |
| 475067                          | 475357 | ybcO | DLP12 prophage protein                                                                                                                                                                                 |
| 475354                          | 475716 | rusA | DLP12 prophage; Holliday junction resolvaseendodeoxyribonuclease RUS                                                                                                                                   |
| 475713                          | 475853 | ylcG | DLP12 prophage protein                                                                                                                                                                                 |
| 475939                          | 476322 | quuD | DLP12 prophage; putative antitermination protein                                                                                                                                                       |
| 476720                          | 477736 | insH | IS5 transposase and trans-activator                                                                                                                                                                    |
| 479381                          | 479596 | essD | DLP12 prophage; putative phage lysis protein                                                                                                                                                           |
| 479596                          | 480093 | arrD | DLP12 prophage; putative lysozyme                                                                                                                                                                      |
| 480090                          | 480551 | rzpD | DLP12 prophage; putative murein endopeptidase                                                                                                                                                          |
| 480310                          | 480492 | rzoD | DLP12 prophage; putative lipoprotein                                                                                                                                                                   |
| 480583                          | 480876 | borD | DLP12 prophage; putative lipoprotein                                                                                                                                                                   |
| 481167                          | 481577 | ybcV | DLP12 prophage protein                                                                                                                                                                                 |
| 481863                          | 482069 | ybcW | DLP12 prophage protein                                                                                                                                                                                 |
| 482234                          | 482428 | ylcI | hypothetical protein                                                                                                                                                                                   |
| 482817                          | 483362 | nohB | DLP12 prophage; DNA packaging protein                                                                                                                                                                  |
| 485664                          | 486413 | appY | DLP12 prophage; DNA-binding transcriptional activator                                                                                                                                                  |
| 510048                          | 511160 | insL | IS186/IS421 transposase                                                                                                                                                                                |
| 589980                          | 590996 | insH | IS5 transposase and trans-activator                                                                                                                                                                    |
| <b>Metabolism related genes</b> |        |      |                                                                                                                                                                                                        |
| 274524                          | 274907 | mhpD | 2-keto-4-pentenoate hydratase                                                                                                                                                                          |
| 274904                          | 275854 | mhpF | catalyzes formation of acetyl-CoA from acetaldehydeacetaldehyde dehydrogenase                                                                                                                          |
| 275851                          | 276864 | mhpE | catalyzes formation of pyruvate and acetaldehyde from 4-hydroxy-2-ketovaleric acid, degradation of phenylpropionate4-hydroxy-2-ketovalerate aldolase                                                   |
| 278755                          | 279294 | yaiL | nucleoprotein-polynucleotide-associated enzyme                                                                                                                                                         |
| 279518                          | 280351 | frmB | putative esterase                                                                                                                                                                                      |
| 280445                          | 281554 | frmA | alcohol dehydrogenase                                                                                                                                                                                  |
| 284722                          | 285918 | yaiP | putative glucosyltransferase                                                                                                                                                                           |
| 290736                          | 291710 | hemB | catalyzes formation of porphobilinogen from 5-aminolevulinatedelta-aminolevulinic acid dehydratase                                                                                                     |
| 301812                          | 302906 | ddl  | D-alanine-D-alanine ligase                                                                                                                                                                             |
| 3305686                         | 306801 | adrA | catalyzes the conversion of 2 GTP into c-di-GMP                                                                                                                                                        |
| 306818                          | 307627 | proC | catalyzes the formation of L-proline from pyrroline-5-carboxylatepyrroline-5-carboxylate reductase                                                                                                     |
| 303730                          | 305145 | phoA | alkaline phosphatase                                                                                                                                                                                   |
| 312127                          | 313035 | mak  | catalyzes phosphorylation of fructose; cytosolic enzymefructokinase                                                                                                                                    |
| 3324498                         | 326315 | malZ | maltodextrin glucosidase                                                                                                                                                                               |
| 326320                          | 326901 | acpH | Converts holo-ACP to apo-ACP by hydrolytic cleavage of the phosphopantetheine prosthetic group from ACPacyl carrier protein phosphodiesterase                                                          |
| 326994                          | 328064 | queA | Synthesizes oQ from preQ1 in a single S-adenosylmethionine-requiring stepS-adenosylmethionine-tRNA ribosyltransferase-isomerase                                                                        |
| 328120                          | 329247 | tgt  | Exchanges the guanine residue with 7-aminomethyl-7-deazaguanine in tRNAs with GU(N) anticodons (tRNA-Asp, -Asn, -His and -Tyr)queuine tRNA-ribosyltransferase                                          |
| 329270                          | 329602 | yajC | member of preprotein translocase; forms a heterotrimer with SecD and SecF; links the SecD/SecF/YajC/YidC complex with the SecY/SecE/SecG complexpreprotein translocase subunit YajC                    |
| 3335438                         | 336541 | ribD | riboflavin biosynthesis protein                                                                                                                                                                        |
| 336630                          | 337100 | ribH | RibE; 6,7-diimethyl-8-ribityllumazine synthase; DMRL synthase; lumazine synthase; beta subunit of riboflavin synthase;                                                                                 |
| 337120                          | 337539 | nusB | Regulates rRNA biosynthesis by transcriptional antiterminationtranscription antitermination protein NusB                                                                                               |
| 337617                          | 338594 | thiL | catalyzes the formation of thiamine diphosphate from thiamine phosphate ant ATPthiamine monophosphate kinase                                                                                           |
| 338572                          | 339090 | pgpA | hydrolyzes phosphatidylglycerophosphate to produce phosphatidylglycerol and phosphatephosphatidylglycerophosphatase A                                                                                  |
| 339144                          | 340118 | yajO | 2-carboxybenzaldehyde reductase                                                                                                                                                                        |
| 340298                          | 342160 | dxs  | catalyzes the formation of 1-deoxy-D-xylulose 5-phosphate from pyruvate and D-glyceraldehyde 3-phosphate1-deoxy-D-xylulose-5-phosphate synthase                                                        |
| 342185                          | 343084 | ispA | geranyltranstransferase                                                                                                                                                                                |
| 343084                          | 343326 | xseB | catalyzes the bidirectional exonucleolytic cleavage of DNAexodeoxyribonuclease VII small subunit                                                                                                       |
| 343532                          | 344980 | thiI | Required for the synthesis of the thiazole moietythiamine biosynthesis protein ThiI                                                                                                                    |
| 345034                          | 345624 | yajL | DJ-1 family protein                                                                                                                                                                                    |
| 345587                          | 346498 | panE | ketopantoate reductase                                                                                                                                                                                 |
| 0357116                         | 358414 | tig  | Tig; RopA; peptidyl-prolyl cis/trans isomerase                                                                                                                                                         |
| 358660                          | 359283 | clpP | hydrolyzes proteins to small peptides; with the ATPase subunits ClpA or ClpX, ClpP degrades specific substratesATP-dependent Clp protease proteolytic subunit                                          |
| 359409                          | 360683 | clpX | binds and unfolds substrates as part of the ClpXP proteaseATP-dependent protease ATP-binding subunit ClpX                                                                                              |
| 363434                          | 363706 | hupB | histone-like DNA-binding proteintranscriptional regulator HU subunit beta                                                                                                                              |
| 363898                          | 365769 | ppiD | peptidyl-prolyl cis-trans isomerase                                                                                                                                                                    |
| 8388                            | 308912 | aroL | type II enzyme similar to type I but differentially regulated and with a lower Km; catalyzes the formation of shikimate 3-phosphate from shikimate in aromatic amino acid biosynthesisshikimate kinase |
| 366835                          | 367530 | queC | quenosine biosynthesis                                                                                                                                                                                 |
| 369395                          | 370213 | cof  | thiamin pyrimidine pyrophosphate hydrolase                                                                                                                                                             |
| 376284                          | 377144 | tesB | acyl-CoA thioesterase II                                                                                                                                                                               |
| 3393395                         | 393946 | apt  | catalyzes a salvage reaction resulting in the formation of AMP                                                                                                                                         |
| 377965                          | 378354 | ybaZ | putative methyltransferase                                                                                                                                                                             |
| 374581                          | 374919 | glnK | indirectly regulates nitrogen metabolism                                                                                                                                                               |
| 381350                          | 381901 | maa  | maltose O-acetyltransferase                                                                                                                                                                            |
| 394075                          | 396006 | dnaX | catalyzes the DNA-template-directed extension of the 3'-end of a DNA strand;                                                                                                                           |

|         |        |      |                                                                                                                                                                                                                                                                                                                                                                                                                                      |
|---------|--------|------|--------------------------------------------------------------------------------------------------------------------------------------------------------------------------------------------------------------------------------------------------------------------------------------------------------------------------------------------------------------------------------------------------------------------------------------|
| 399158  | 399802 | adk  | essential enzyme that recycles AMP in active cells                                                                                                                                                                                                                                                                                                                                                                                   |
| 400038  | 401000 | hemH | protoheme ferro-lyase                                                                                                                                                                                                                                                                                                                                                                                                                |
| 400997  | 401956 | aes  | acetyl esterase                                                                                                                                                                                                                                                                                                                                                                                                                      |
| 402108  | 403412 | gsk  | inosine/guanosine kinase                                                                                                                                                                                                                                                                                                                                                                                                             |
| 406897  | 408549 | ushA | catalyzes the degradation of periplasmic UDP-glucose to uridine, glucose-1-phosphate and inorganic phosphate                                                                                                                                                                                                                                                                                                                         |
| 4420323 | 421132 | ybbO | short chain dehydrogenase                                                                                                                                                                                                                                                                                                                                                                                                            |
| 421122  | 421748 | tesA | multifunctional acyl-CoA thioesterase I/protease I/lysophospholipase L1                                                                                                                                                                                                                                                                                                                                                              |
| 432115  | 433209 | ybbB | catalyzes the selenophosphate-dependent transfer of selenium from selenophosphate for conversion of 2-thiouridine to 2-selenouridine at the wobble position in tRNA <sup>tRNA</sup> 2-selenouridine synthase                                                                                                                                                                                                                         |
| 434434  | 434916 | allA | catalyzes the formation of glyoxylate from (S)-ureidoglycolateureidoglycolate hydrolase                                                                                                                                                                                                                                                                                                                                              |
| 413624  | 414556 | ybaS | catalyzes the formation of glutamate from glutamineglutaminase                                                                                                                                                                                                                                                                                                                                                                       |
| 435899  | 437680 | gcl  | catalyzes the formation of 2-hydroxy-3-oxopropanoate (tartronate semialdehyde) from two molecules of glyoxylateglyoxylate carbolygase                                                                                                                                                                                                                                                                                                |
| 437693  | 438469 | hyi  | hydroxypyruvate isomerase                                                                                                                                                                                                                                                                                                                                                                                                            |
| 438569  | 439447 | glxR | tartronate semialdehyde reductase, NADH-dependent                                                                                                                                                                                                                                                                                                                                                                                    |
| 439616  | 441070 | ybbW | allantoin permease                                                                                                                                                                                                                                                                                                                                                                                                                   |
| 441130  | 442491 | allB | Plays a crucial role on both purine and pyrimidine metabolismallantoinase                                                                                                                                                                                                                                                                                                                                                            |
| 442548  | 443849 | ybbY | putative purine permease YbbY                                                                                                                                                                                                                                                                                                                                                                                                        |
| 4446040 | 447275 | allC | allantoate amidohydrolase and N-carbamoyl-L-amino acid amidohydrolase are very similar; the allantoate amidohydrolase from Escherichia coli forms a dimer and binds zinc ions for catalytic activity and catalyzes the conversion of allantoate to (S)-ureidoglycolate and ammonia; carbamoyl amidohydrolase from Bacillus sp. converts N-carbamoyl amino acids to amino acids, ammonia, and carbon dioxideallantoate amidohydrolase |
| 447297  | 448346 | allD | ureidoglycolate dehydrogenase                                                                                                                                                                                                                                                                                                                                                                                                        |
| 43871   | 445016 | glxK | glycerate kinase                                                                                                                                                                                                                                                                                                                                                                                                                     |
| 452422  | 453315 | ybcF | carbamate kinase                                                                                                                                                                                                                                                                                                                                                                                                                     |
| 453510  | 454577 | purK | With PurE catalyzes the conversion of aminoimidazole ribonucleotide to carboxyaminoimidazole ribonucleotide in the de novo purine nucleotide biosynthetic pathwayphosphoribosylaminoimidazole carboxylase ATPase subunit                                                                                                                                                                                                             |
| 454574  | 455083 | purE | N5-carboxyaminoimidazole ribonucleotide mutase                                                                                                                                                                                                                                                                                                                                                                                       |
| 455201  | 455923 | lpxH | catalyzes the formation of 2,3=diacylglucosamine 1-phosphate from UDP-2,3=diacylglucosamineUDP-2,3-diacylglucosamine hydrolase                                                                                                                                                                                                                                                                                                       |
| 455926  | 456420 | ppiB | peptidyl-prolyl cis-trans isomerase B                                                                                                                                                                                                                                                                                                                                                                                                |
| 456594  | 457979 | cysS | catalyzes a two-step reaction; charges a cysteine by linking its carboxyl group to the alpha-phosphate of ATP then transfers the aminoacyl-adenylate to its tRNA <sup>cysteine</sup> tRNA synthetase                                                                                                                                                                                                                                 |
| 458858  | 459724 | folD | catalyzes the formation of 5,10-methenyltetrahydrofolate from 5,10-methylenetetrahydrofolate and subsequent formation of 10-formyltetrahydrofolate from 5,10-methenyltetrahydrofolatebifunctional 5,10-methylene-tetrahydrofolate dehydrogenase/ 5,10-methylene-tetrahydrofolate cyclohydrolase                                                                                                                                      |
| 506754  | 507407 | nfsB | catalyzes the reduction of nitroaromatic compounds such as nitrofurazone, quinones and the anti-tumor agent CB1954; NAD(P)H-dependent; oxygen insensitive dihydropteridine reductase                                                                                                                                                                                                                                                 |
| 508248  | 509366 | ybdK | ATP-dependent; carboxylate-amine ligase with weak glutamate-cysteine ligase activitycarboxylate-amine ligase                                                                                                                                                                                                                                                                                                                         |
| 511442  | 512071 | entD | phosphopantetheinyltransferase component of enterobactin synthase multienzyme complex                                                                                                                                                                                                                                                                                                                                                |
| 512237  | 514477 | fepA | outer membrane receptor of ferric enterobactin and colicins B and D                                                                                                                                                                                                                                                                                                                                                                  |
| 514798  | 515922 | fes  | enterobactin/ferric enterobactin esterase                                                                                                                                                                                                                                                                                                                                                                                            |
| 515925  | 516143 | ybdZ | hypothetical protein                                                                                                                                                                                                                                                                                                                                                                                                                 |
| 516140  | 520021 | entF | with EntB, EntD, and EntE forms the multienzyme complex enterobactin synthase                                                                                                                                                                                                                                                                                                                                                        |
| 520237  | 521370 | fepE | part of the ferric enterobactin transport system                                                                                                                                                                                                                                                                                                                                                                                     |
| 521367  | 522182 | fepC | with FepBDE is involved in the transport of ferric enterobactiniron-enterobactin transporter ATP-binding protein                                                                                                                                                                                                                                                                                                                     |
| 522179  | 523171 | fepG | with FepBCD is involved in the transport of ferric enterobactiniron-enterobactin transporter permease                                                                                                                                                                                                                                                                                                                                |
| 523168  | 524172 | fepD | with FepBCG is involved in the transport of ferric enterobactiniron-enterobactin transporter membrane protein                                                                                                                                                                                                                                                                                                                        |
| 524283  | 525533 | entS | protein p43; inner membrane protein that exports enterobactin to the periplasmic space; member of the major facilitator superfamily (MFS) of transportersenterobactin exporter EntS                                                                                                                                                                                                                                                  |
| 525537  | 526493 | fepB | with FepCDG is involved in the transport of ferric enterobactiniron-enterobactin transporter periplasmic binding protein                                                                                                                                                                                                                                                                                                             |
| 526868  | 528043 | entC | isochorismate synthase 1                                                                                                                                                                                                                                                                                                                                                                                                             |
| 528053  | 529663 | entE | bifunctional 2,3-dihydroxybenzoate-AMP ligase/S-dihydroxybenzoyltransferase                                                                                                                                                                                                                                                                                                                                                          |
| 529677  | 530534 | entB | isochorismatase                                                                                                                                                                                                                                                                                                                                                                                                                      |
| 530534  | 531280 | entA | catalyzes the formation of 2,3-dihydroxybenzoate from 2,3-dihydro-2,3-dihydroxybenzoate; involved in the biosynthesis of siderophores, enterobactin, bacillibactin or vibriobactin2,3-dihydroxybenzoate-2,3-dehydrogenase                                                                                                                                                                                                            |
| 531877  | 533982 | cstA | carbon starvation protein                                                                                                                                                                                                                                                                                                                                                                                                            |
| 534372  | 535460 | ybdH | member of the iron-containing alcohol dehydrogenase family; unknown functionhypothetical protein                                                                                                                                                                                                                                                                                                                                     |
| 535569  | 536729 | ybdL | catalyzes the transfer of an amino moietyputative aminotransferase                                                                                                                                                                                                                                                                                                                                                                   |
| 539810  | 540556 | dsbG | Involved in disulfide bond formationdisulfide isomerase/thiol-disulfide oxidase                                                                                                                                                                                                                                                                                                                                                      |
| 540928  | 541491 | ahpC | with AhpF catalyzes the conversion of alkyl hydroperoxides to their corresponding alcohols; AhpC reduced the hydroperoxide substratealkyl hydroperoxide reductase subunit C                                                                                                                                                                                                                                                          |
| 541736  | 543301 | ahpF | alkyl hydroperoxide reductase, F52a subunit, FAD/NAD(P)-binding                                                                                                                                                                                                                                                                                                                                                                      |
| 544071  | 545309 | ybdR | putative oxidoreductase, Zn-dependent and NAD(P)-binding                                                                                                                                                                                                                                                                                                                                                                             |
| 545540  | 545950 | rnk  | Regulates the synthesis of nucleoside triphosphates for nucleic acid synthesis, CTP for lipid synthesis, and GTP for protein elongationnucleoside diphosphate kinase regulator                                                                                                                                                                                                                                                       |
| 546180  | 546986 | rna  | ribonuclease I                                                                                                                                                                                                                                                                                                                                                                                                                       |
| 547100  | 548563 | citT | citrate:succinate antiporter                                                                                                                                                                                                                                                                                                                                                                                                         |
| 548614  | 549492 | citG | catalyzes the formation of 2'-(5"-triphosphoribosyl)-3'-dephospho-CoA from ATP and 3-dephospho-CoAtriphosphoribosyl-dephospho-CoA synthase                                                                                                                                                                                                                                                                                           |

|        |        |      |                                                                                                                                                                                                                                                                                                                   |
|--------|--------|------|-------------------------------------------------------------------------------------------------------------------------------------------------------------------------------------------------------------------------------------------------------------------------------------------------------------------|
| 549467 | 550018 | citX | 2'-(5"-phosphoribosyl)-3'-dephospho-CoA transferase; holo-citrate lyase synthase; CitG forms the prosthetic group precursor 2'-(5"-triphosphoribosyl)-3'-dephospho-CoA which is then transferred to apo-ACP by CitX to produce holo-ACP and pyrophosphate2-(5"-triphosphoribosyl)-3'-dephosphocoenzyme-A synthase |
| 550022 | 551554 | citF | citrate lyase, citrate-ACP transferase (alpha) subunit                                                                                                                                                                                                                                                            |
| 551565 | 552473 | citE | citrate lyase, citryl-ACP lyase (beta) subunit                                                                                                                                                                                                                                                                    |
| 552470 | 552766 | citD | acyl carrier protein; with CitE and CitF catalyzes the formation of oxaloacetate from citratecitrate lyase subunit gamma                                                                                                                                                                                          |
| 552781 | 553839 | citC | citrate lyase synthetase                                                                                                                                                                                                                                                                                          |
| 558540 | 559100 | pagP | catalyzes the transfer of palmitate to lipid Apalmitoyl transferase                                                                                                                                                                                                                                               |
| 561234 | 562199 | lipA | catalyzes the radical-mediated insertion of two sulfur atoms into an acyl carrier protein (ACP) bound to an octanoyl group to produce a lipoyl groulipoyl synthase                                                                                                                                                |
| 562408 | 563361 | ybeF | putative DNA-binding transcriptional regulator                                                                                                                                                                                                                                                                    |
| 563620 | 564261 | lipB | lipoyl/octanoyltransferase                                                                                                                                                                                                                                                                                        |
| 585460 | 586395 | rihA | Hydrolyzes with equal efficiency cytidine or uridine to ribose and cytosine or uracil, respectively; pyrimidine-specificribonucleoside hydrolase 1                                                                                                                                                                |

---

**Other genes**


---

|          |        |      |                                                                                                                                                                                                                                                                                                                                                         |
|----------|--------|------|---------------------------------------------------------------------------------------------------------------------------------------------------------------------------------------------------------------------------------------------------------------------------------------------------------------------------------------------------------|
| 281589   | 281864 | frmR | formaldehyde-induced negative regulator of the frmRAB operonregulator protein FrmR                                                                                                                                                                                                                                                                      |
| 282052   | 282825 | yaiO | hypothetical protein                                                                                                                                                                                                                                                                                                                                    |
| 286042   | 286599 | yaiS | hypothetical protein                                                                                                                                                                                                                                                                                                                                    |
| 296444   | 297112 | yaiV | putative DNA-binding transcriptional regulator                                                                                                                                                                                                                                                                                                          |
| 299855   | 300949 | yaiW | putative DNA-binding transcriptional regulator                                                                                                                                                                                                                                                                                                          |
| 301008   | 301316 | yaiY | putative inner membrane protein                                                                                                                                                                                                                                                                                                                         |
| 301576   | 301788 | yaiZ | putative inner membrane protein                                                                                                                                                                                                                                                                                                                         |
| 303369   | 303629 | iraP | hypothetical protein                                                                                                                                                                                                                                                                                                                                    |
| 305264   | 305584 | psiF | hypothetical protein                                                                                                                                                                                                                                                                                                                                    |
| 3308962  | 309153 | yaiA | hypothetical protein                                                                                                                                                                                                                                                                                                                                    |
| 309411   | 310088 | aroM | hypothetical protein                                                                                                                                                                                                                                                                                                                                    |
| 310160   | 310444 | yaiE | hypothetical protein                                                                                                                                                                                                                                                                                                                                    |
| 307747   | 308205 | yaiI | hypothetical protein                                                                                                                                                                                                                                                                                                                                    |
| 31091    | 312002 | rdgC | Required for efficient pilin antigenic variationrecombination associated protein                                                                                                                                                                                                                                                                        |
| 317733   | 318935 | sbcD | with SbcC cleaves DNA hairpin structure, also has 5' single-strand endonuclease activityexonuclease subunit SbcD                                                                                                                                                                                                                                        |
| 319125   | 319814 | phoB | two component response regulator for the phosphate regulon; PhoR phosphorylates PhoBtranscriptional regulator PhoB                                                                                                                                                                                                                                      |
| 319872   | 321167 | phoR | membrane-associated histidine protein kinase, part of the two-component phosphate regulatory system phoR/phoBphosphate regulon sensor protein                                                                                                                                                                                                           |
| 321574   | 322893 | brnQ | putative branched chain amino acid transporter (LIV-II)                                                                                                                                                                                                                                                                                                 |
| 31332588 | 332935 | yajD | hypothetical protein                                                                                                                                                                                                                                                                                                                                    |
| 3314590  | 317736 | sbcC | with SbcD cleaves DNA hairpin structures; also has 5' single-strand endonuclease activityexonuclease subunit SbcC                                                                                                                                                                                                                                       |
| 333112   | 333996 | tsx  | nucleoside channel phage T6/colicin K receptor                                                                                                                                                                                                                                                                                                          |
| 334295   | 334834 | yajI | hypothetical protein                                                                                                                                                                                                                                                                                                                                    |
| 334985   | 335434 | nrdR | transcriptional regulator NrdR                                                                                                                                                                                                                                                                                                                          |
| 3365920  | 366291 | ybaV | hypothetical protein                                                                                                                                                                                                                                                                                                                                    |
| 3349700  | 350029 | cyoD | cytochrome o ubiquinol oxidase subunit IV                                                                                                                                                                                                                                                                                                               |
| 3378655  | 379008 | ybaA | hypothetical protein                                                                                                                                                                                                                                                                                                                                    |
| 346666   | 347157 | yajQ | putative nucleotide binding property based on structural studies of Haemophilus influenzae crystallized protein in PDB Accession Number 1IN0 and NMR studies of Escherichia coli YajQ; the YajQ protein from Pseudomonas syringae appears to play a role in activation of bacteriophage phi6 segment L transcriptionputative nucleotide-binding protein |
| 348798   | 349688 | cyoE | converts protoheme IX and farnesyl diphosphate to heme Oprotoheme IX farnesyltransferase                                                                                                                                                                                                                                                                |
| 350029   | 350643 | cyoC | cytochrome o ubiquinol oxidase subunit III                                                                                                                                                                                                                                                                                                              |
| 350633   | 352624 | cyoB | cytochrome o ubiquinol oxidase subunit I                                                                                                                                                                                                                                                                                                                |
| 352646   | 353593 | cyoA | cytochrome o ubiquinol oxidase subunit II                                                                                                                                                                                                                                                                                                               |
| 366385   | 366783 | ybaW | hypothetical protein                                                                                                                                                                                                                                                                                                                                    |
| 355572   | 356150 | yajG | hypothetical protein                                                                                                                                                                                                                                                                                                                                    |
| 356455   | 356772 | bolA | positive transcriptional regulator of morphogenetic pathway; controlling several genes involved in oxidative stress, acid stress, heat shock, osmotic shock, and carbon-starvation stresstranscriptional regulator Bola                                                                                                                                 |
| 370366   | 370824 | ybaO | putative DNA-binding transcriptional regulator                                                                                                                                                                                                                                                                                                          |
| 377362   | 377934 | ybaY | putative outer membrane lipoprotein                                                                                                                                                                                                                                                                                                                     |
| 379050   | 380600 | ybaB | hypothetical protein                                                                                                                                                                                                                                                                                                                                    |
| 380764   | 381234 | ybaC | putative inner membrane protein                                                                                                                                                                                                                                                                                                                         |
| 382073   | 382291 | hha  | with Hns involved in transcriptional regulation of hemolysin                                                                                                                                                                                                                                                                                            |
| 382317   | 382691 | ybaJ | hypothetical protein                                                                                                                                                                                                                                                                                                                                    |
| 388519   | 391881 | kefA | small mechanosensitive ion channel (MscS) that opens in response to stretch forces in the membrane lipid bilayer; maintains cell turgor through accumulation and release of potassium; large protein class of MscSpotassium efflux protein KefA                                                                                                         |
| 392093   | 392254 | ybaM | hypothetical protein                                                                                                                                                                                                                                                                                                                                    |
| 392268   | 392795 | priC | PriC; protein involved in DNA replication; part of the primosome, a protein complex required to restart stalled replication forks;                                                                                                                                                                                                                      |
| 392865   | 393242 | ybaN | hypothetical protein                                                                                                                                                                                                                                                                                                                                    |
| 396059   | 396388 | ybaB | hypothetical protein                                                                                                                                                                                                                                                                                                                                    |
| 396388   | 396993 | recR | involved in a recombinational process of DNA repair, independent of the recBC complexrecombination protein RecR                                                                                                                                                                                                                                         |
| 397103   | 398977 | htpG | molecular chaperoneheat shock protein 90                                                                                                                                                                                                                                                                                                                |
| 408586   | 409065 | ybaK | hypothetical protein                                                                                                                                                                                                                                                                                                                                    |
| 409187   | 409268 | sroB | Novel sRNA, function unknown                                                                                                                                                                                                                                                                                                                            |
| 409269   | 410063 | ybaP | hypothetical protein                                                                                                                                                                                                                                                                                                                                    |
| 410201   | 410542 | ybaQ | putative DNA-binding transcriptional regulator                                                                                                                                                                                                                                                                                                          |

|          |        |      |                                                                                                                                                                                                                    |
|----------|--------|------|--------------------------------------------------------------------------------------------------------------------------------------------------------------------------------------------------------------------|
| 415976   | 416383 | cueR | activator of copper-responsive regulon genes, DNA-binding transcriptional regulator CueR                                                                                                                           |
| 416384   | 416842 | ybbJ | hypothetical protein                                                                                                                                                                                               |
| 4418566  | 419345 | ybbM | putative inner membrane protein                                                                                                                                                                                    |
| 419408   | 420262 | ybbN | putative thioredoxin domain-containing protein                                                                                                                                                                     |
| 1422399  | 424813 | ybbP | putative inner membrane protein                                                                                                                                                                                    |
| 429564   | 429932 | ybbC | hypothetical protein                                                                                                                                                                                               |
| 416839   | 417756 | qmcA | putative protease, membrane anchored                                                                                                                                                                               |
| 433278   | 434204 | allS | activator of the allDC-ylbA operon involved in allantoin utilizationDNA-binding transcriptional activator AllS                                                                                                     |
| 434994   | 435809 | allR | regulates operons involved in the utilization of allantoinDNA-binding transcriptional repressor AllR                                                                                                               |
| 445244   | 446029 | ylbA | hypothetical protein                                                                                                                                                                                               |
| 448663   | 450330 | fdrA | multicopy suppressor of dominant negative ftsH mutationsmembrane protein FdrA                                                                                                                                      |
| 451610   | 452425 | ylbF | hypothetical protein                                                                                                                                                                                               |
| 458015   | 458536 | ybcI | hypothetical protein                                                                                                                                                                                               |
| 458644   | 458856 | ybcJ | hypothetical protein                                                                                                                                                                                               |
| 460195   | 460737 | sfmA | putative fimbrial-like adhesin protein                                                                                                                                                                             |
| 460957   | 461649 | sfmC | pilin chaperone, periplasmic                                                                                                                                                                                       |
| 461680   | 464283 | sfmD | putative outer membrane export usher protein                                                                                                                                                                       |
| 464319   | 465302 | sfmH | putative fimbrial-like adhesin protein                                                                                                                                                                             |
| 465313   | 465828 | sfmF | putative fimbrial protein                                                                                                                                                                                          |
| 465831   | 466463 | fimZ | activates the production of the major fimbriae protein FimAtranscriptional regulator FimZ                                                                                                                          |
| 466706   | 466782 | argU | tRNA-Arg                                                                                                                                                                                                           |
| 474351   | 474452 | ylcH | hypothetical protein                                                                                                                                                                                               |
| 486663   | 487616 | ompT | outer membrane protease; involved in virulence in many organisms; OmpT; IcsP; SopA; Pla; PgtE; ompT; in Escherichia coli OmpT can degrade antimicrobial peptides;                                                  |
| 488040   | 488084 | pauD | Xaa-tRNA                                                                                                                                                                                                           |
| 488130   | 488891 | envY | DNA-binding transcriptional activator of porin biosynthesis                                                                                                                                                        |
| 489074   | 489964 | ybcH | hypothetical protein                                                                                                                                                                                               |
| 489965   | 492937 | nfrA | bacteriophage N4 receptor, outer membrane subunit                                                                                                                                                                  |
| 492924   | 495161 | nfrB | bacteriophage N4 adsorption protein B                                                                                                                                                                              |
| 505399   | 506646 | ybdG | putative mechanosensitive channel                                                                                                                                                                                  |
| 507501   | 507869 | ybdF | hypothetical protein                                                                                                                                                                                               |
| 507934   | 508182 | ybdJ | putative inner membrane protein                                                                                                                                                                                    |
| 509819   | 509971 | hokE | toxic polypeptide, small                                                                                                                                                                                           |
| — 531283 | 531696 | ybdB | hypothetical protein                                                                                                                                                                                               |
| 534165   | 534362 | ybdD | hypothetical protein                                                                                                                                                                                               |
| 536730   | 537359 | ybdM | hypothetical protein                                                                                                                                                                                               |
| 537332   | 538552 | ybdN | hypothetical protein                                                                                                                                                                                               |
| 538699   | 539601 | ybdO | putative DNA-binding transcriptional regulator                                                                                                                                                                     |
| 543422   | 543850 | uspG | universal stress protein UP12                                                                                                                                                                                      |
| 554218   | 555876 | dpiB | sensory histidine kinase in two-component regulatory system with citB                                                                                                                                              |
| 555845   | 556525 | dpiA | regulates the expression of citAB in citrate fermentationtwo-component response regulator DpiA                                                                                                                     |
| 559275   | 559484 | cspE | member of the CspA family;                                                                                                                                                                                         |
| 559538   | 559921 | crcB | may be involved in chromosome condensation                                                                                                                                                                         |
| 560930   | 561133 | tatE | TatE; similar to TatA and found in some proteobacteria; part of system that translocates proteins with a conserved twin arginine motif across the inner membrane                                                   |
| 564362   | 564625 | ybeD | hypothetical protein                                                                                                                                                                                               |
| 566085   | 567173 | rlpA | rare lipoprotein A                                                                                                                                                                                                 |
| 570231   | 570698 | ybeA | SPOUT methyltransferase family protein; crystal structure shows homodimer; in Escherichia coli this protein methylates pseudouridine at position 1915 of the 23S ribosomal RNArRNA large subunit methyltransferase |
| 570702   | 571019 | ybeB | hypothetical protein                                                                                                                                                                                               |
| 571279   | 571890 | cobC | putative alpha-ribazole-5'-P phosphatase                                                                                                                                                                           |
| 571914   | 572555 | nadD | transfers an adenyl group from ATP to NaMN to form nicotinic acid adenine dinucleotide (NaAD)                                                                                                                      |
| 572557   | 573588 | hola | required for the assembly and function of the DNAX complex which is required for the assembly of the beta subunit onto primed DNADNA polymerase III subunit delta                                                  |
| 573588   | 574169 | rlpB | rare lipoprotein B; involved in the assembly of LPS in the outer membraneLPS-assembly lipoprotein RlpB                                                                                                             |
| 574184   | 576766 | leuS | leucine-tRNA ligase                                                                                                                                                                                                |
| 577001   | 577483 | ybeL | hypothetical protein                                                                                                                                                                                               |
| 577553   | 578530 | ybeQ | hypothetical protein                                                                                                                                                                                               |
| 578694   | 579401 | ybeR | hypothetical protein                                                                                                                                                                                               |
| 579398   | 580825 | djlB | putative chaperone                                                                                                                                                                                                 |
| 580835   | 581389 | ybeT | hypothetical protein                                                                                                                                                                                               |
| 581491   | 582198 | ybeU | putative tRNA ligase                                                                                                                                                                                               |
| 582195   | 583646 | djlC | Hsc56 co-chaperone of HscC                                                                                                                                                                                         |
| 583706   | 585376 | hscC | Hsp70 family chaperone Hsc62, binds to RpoD and inhibits transcription                                                                                                                                             |
